# Supplementary material for: ELTD1 Activation Induces an Endothelial-EMT Transition to a Myofibroblast Phenotype
Source: Preprints.org preprint supplement (doi:10.20944/preprints202109.0402.v1), 2021-09-23
Supplement: Supplementary file 1 [file Table S1.docx]

**Table S1. QPCR primer sequences.**

| Gene | Forward | Reverse |
| --- | --- | --- |
| *GAPDH* | 5’-AGCCACATCGCTCAGACAC | 5’-GCCCAATACGACCAAATCC |
| *SMA* | 5’-ACAGAGTATTTGCGCTCCGAA | 5’-CCGACCGAATGCAGAAGGA |
| *CD34* | 5’-GGTGGCTGATACCGAATTG | 5’-CACGTGGTCAGATGCAGAG |
| *coELTD1* | 5’-CACCATGAAGAGACTGCCCCTGCTGGTGG | 5’-TCTCAGGCAGCCGAAGCAACAGG |
| *ELTD1* | 5’-CCAAGGACACCCTTTCTAACTC | 5’-TCACAGATAACTTGTCCCAAACT |
| *IL1A* | 5’-TGTATGTGACTGCCCAAGATG | 5’-TTAGTGCCGTGAGTTTCCC |
| *CSF2* | 5’-TCTCAGAAATGTTTGACCTCCA | 5’-GCCCTTGAGCTTGGTGAG |
| *LIF* | 5’-GGCCCGGAACACCCATAGACG | 5’-CCACGCGCCATCCAGGTAAA |
| *STC1* | 5’-GCAGGAAGAGTGCTACAGCAAG | 5’-CATTCCAGCAGGCTTCGGACAA |
| *STC2* | 5’-GACTTGCTGCTGCACGAAC | 5’-AGTTCTGCTCACACTGAACCTG |
| *NAT8L* | 5’-TGTGCATCCGAGAGTTCCGT | 5’-CGGAAGGCCGTGTTAGGGAT |
| *HMOX1* | 5’-CGGATGGAGCGTCCGCAACC | 5’-TCACCAGCTTGAAGCCGTCTCG |
| *JUN* | 5’-AGCTGGAGCGCCTGATAATC | 5’-CTCCTGCTCATCTGTCACGTTCT |
| *RAB11FIP4* | 5’-GCCCAGACTAAAGCCCAGT | 5’-CTCCTTCAGGGCTTCCATT |
| *ANGPTL4* | 5’-GACAAGAACTGCGCCAAGA | 5’-GCCGTTGAGGTTGGAATG |
| *NAV3* | 5’-CAGAGAGGGGTTCACGATGT | 5’-ACCACTGCTCACTGAACTGC |
| *ADAT2* | 5’-GGAATCCCAAACCACTGGACA | 5’-GGTAGCGTCGTCGTAAAGCACA |
| *ACE* | 5’-CCAACCTGCCCCTGGCTAAG | 5’-GCGAGGAAGCCAGGATGTT |
| *CENPF* | 5’-CGAAGAACAACCATGGCAACTCG | 5’-TTCTCGGAGGATGGTGCCTGAAT |
| *MCM10* | 5’-GAAGAAGGTTACGCCACAGAG | 5’-TTTACAGGTTCCCAGGTCAAG |
| *ATF3* | 5’-TTTGCCATCCAGAACAAGC | 5’-CATCTTCTTCAGGGGCTACCT |
| *MMP1* | 5’-GCTAACCTTTGATGCTATAACTACGA | 5’-TTTGTGCGCATGTAGAATCTG |
| *TTN* | 5’-CTGCTGACTACACCTTTGTGGC | 5’-GCTCGCTTCTTCTCCAGTACCT |
| *CDCA2* | 5’-ATGACCGGCTGTCTGGAAT | 5’-GCTGAGACCTTCCTTTCTGGT |
| *CEP55* | 5’-TGAAGAGAAAGACGTATTGAAACAA | 5’-GCAGTTTGGAGCCACAGTCT |
| *HIST1H3C* | 5’-GCTTGCTACTAAAGCAAGCCC | 5’-AGCGCACAGATTGGTGTCTTC |
| *IQGAP* | 5’-GCAGAATGTTGCCTATCAG | 5’-CGGAAATGTAAGCCAGTTG |
