# Supplementary material for: ELTD1 Activation Induces an Endothelial-EMT Transition to a Myofibroblast Phenotype
Source: Preprints.org preprint supplement (doi:10.20944/preprints202109.0402.v1), 2021-09-23
Supplement: Supplementary file 2 [file Table S2.xlsx]

## Sheet: 2019-08-09_edgeR_DE.significant
Table S2. RNA Expression changes at 48hrs
logFC	logCPM	F	PValue	FDR	gene_symbol
5.48048	-0.545686	201.107	5.20425e-11	1.2023e-09	LONRF2
4.61559	0.706154	364.115	3.97113e-13	2.28798e-11	NAT8L
4.14293	-0.728076	107.164	7.19846e-09	8.14319e-08	RAB11FIP4
4.02177	2.4985	303.046	1.82487e-12	7.59349e-11	STC1
3.97833	-0.578926	111.487	5.33357e-09	6.35695e-08	NEFM
3.95948	0.0849909	186.153	9.68344e-11	2.06295e-09	ENSG00000240476.1
3.81506	1.34009	356.539	4.73211e-13	2.56079e-11	LAMB4
3.38382	-0.513775	114.643	4.3124e-09	5.35046e-08	ENSG00000231966.1
3.31534	0.987567	356.464	4.7404e-13	2.56079e-11	OLAH
3.16027	5.83704	447.601	7.04503e-14	5.79525e-12	CXCL8
3.14153	-0.504993	48.4161	2.00479e-06	1.03333e-05	SERPINB2
3.07691	1.10756	318.83	1.19852e-12	5.34674e-11	SH2D5
2.96184	6.45568	1328.07	6.59938e-18	1.17395e-14	HMOX1
2.95182	4.00182	1390.99	4.42902e-18	9.0042e-15	IL7R
2.90088	-0.306668	69.0102	1.80292e-07	1.27712e-06	ANK2
2.8784	0.879665	40.7463	6.02795e-06	2.70867e-05	SERPIND1
2.86531	1.32051	199.085	5.64576e-11	1.28142e-09	GEM
2.78658	-0.269553	111.101	5.476e-09	6.49408e-08	ENSG00000240244.3
2.75936	-0.948253	71.861	1.35386e-07	9.99311e-07	SH2D2A
2.75201	1.52017	204.296	4.58415e-11	1.07298e-09	SLC6A9
2.72042	0.950863	221.666	2.3683e-11	6.19546e-10	IL31RA
2.71528	1.26156	191.993	7.55825e-11	1.66213e-09	TG
2.68782	4.66707	1699.6	7.86228e-19	3.7296e-15	ANGPTL4
2.60612	0.718935	88.4952	3.00278e-08	2.78207e-07	FHDC1
2.60094	5.2288	1551.85	1.72382e-18	4.90633e-15	STC2
2.57073	2.68537	475.648	4.22354e-14	3.90734e-12	CLDN14
2.55936	-0.590113	37.6017	9.89075e-06	4.16806e-05	SPTB
2.51721	0.396299	136.351	1.13334e-09	1.69062e-08	LINC00520
2.50658	-0.67369	60.6776	4.41587e-07	2.77209e-06	LINC00862
2.47389	0.520971	98.3388	1.37352e-08	1.40421e-07	AADACP1
2.45724	0.482779	132.095	1.44999e-09	2.09917e-08	FST
2.43069	2.87064	383.256	2.58878e-13	1.62515e-11	ADM2
2.42775	3.1767	874.958	2.37618e-16	1.09082e-13	IL1A
2.41676	-0.526864	47.4874	2.27422e-06	1.15794e-05	HOMER2
2.38965	2.20509	373.731	3.19464e-13	1.93459e-11	ULBP1
2.37153	0.27984	112.13	5.10544e-09	6.14163e-08	KCNMB2-AS1
2.31513	-0.322389	62.8986	3.44618e-07	2.24246e-06	DIRAS1
2.30868	-0.350447	46.5611	2.58378e-06	1.2938e-05	PAPPA2
2.30736	8.34208	225.83	2.03608e-11	5.46707e-10	IFI6
2.26585	-0.60084	21.5479	0.000218984	0.000630458	PURPL
2.24855	8.36554	1176.38	1.87433e-17	2.20492e-14	PTX3
2.24144	-0.539492	51.4714	1.34068e-06	7.30165e-06	C3AR1
2.23707	-0.572357	51.1482	1.39776e-06	7.56333e-06	MYH14
2.20845	-0.627416	77.203	8.10862e-08	6.42504e-07	ENSG00000243193.3
2.1881	0.613301	89.7146	2.71487e-08	2.56032e-07	ANKRD33
2.16938	8.09212	1965.6	2.23778e-19	2.94582e-15	TNFSF15
2.15768	2.24408	315.591	1.30436e-12	5.71148e-11	TNFRSF9
2.14064	-0.0566494	77.5217	7.87173e-08	6.26525e-07	LOC105370526
2.11082	-0.232888	43.5958	3.93896e-06	1.87038e-05	ENSG00000230849.2
2.10282	3.20702	490.786	3.24299e-14	3.22734e-12	FOXF1
2.09918	3.06019	434.86	8.98054e-14	6.98372e-12	CHAC1
2.07486	-0.0962849	101.371	1.09408e-08	1.15503e-07	GREB1
2.07316	5.91956	143.758	7.50049e-10	1.18336e-08	IL1RL1
2.04641	1.71797	63.7216	3.14926e-07	2.08258e-06	XIRP2
2.03902	1.98258	91.5085	2.34564e-08	2.2509e-07	ADTRP
2.03802	-0.581561	74.1552	1.08231e-07	8.22777e-07	ENSG00000279142.1
2.00162	2.25654	82.0365	5.22663e-08	4.41687e-07	OASL
2.00138	1.45941	108.713	6.45741e-09	7.44695e-08	NMRAL2P
1.96521	4.88924	698.009	1.6361e-15	3.94632e-13	ASNS
1.94324	0.472859	64.1308	3.01231e-07	2.00976e-06	DAW1
1.93985	3.16531	357.485	4.62875e-13	2.53353e-11	NEK10
1.93578	1.55545	135.608	1.18261e-09	1.75309e-08	ENSG00000257732.1
1.9286	3.30831	425.853	1.07064e-13	7.97708e-12	LPXN
1.90493	7.01731	1003.3	7.35396e-17	5.50812e-14	NAV3
1.89559	-0.191725	29.0065	4.51831e-05	0.000157869	LAMA1
1.88966	4.90954	717.286	1.29715e-15	3.48298e-13	ATF3
1.88661	2.17009	198.849	5.69994e-11	1.29165e-09	DNAH11
1.87608	-0.30334	43.8239	3.81041e-06	1.8154e-05	ENSG00000279266.1
1.86306	2.21292	106.512	7.53804e-09	8.45342e-08	CPNE7
1.84905	1.13415	152.803	4.64634e-10	7.79741e-09	LURAP1L-AS1
1.8365	-0.140559	43.7569	3.84768e-06	1.8307e-05	PTHLH
1.83643	-0.227948	40.7577	6.01748e-06	2.70568e-05	COL17A1
1.83217	5.56208	429.747	9.91858e-14	7.50805e-12	PSAT1
1.8316	0.137712	58.3282	5.78581e-07	3.49779e-06	CDKL4
1.83023	1.83799	63.7994	3.12269e-07	2.06982e-06	MYEOV
1.82614	0.53046	56.2214	7.42663e-07	4.36548e-06	BHLHE41
1.8082	3.65166	250.882	8.63385e-12	2.68271e-10	OSGIN1
1.80097	0.944527	65.1892	2.6879e-07	1.8189e-06	ENSG00000255090.4
1.79883	3.57499	335.966	7.7606e-13	3.71855e-11	DDIT3
1.79139	-0.480147	54.6916	8.94385e-07	5.12605e-06	C2orf16
1.77939	-0.445968	39.4262	7.39533e-06	3.23824e-05	ENSG00000273017.1
1.76421	0.982519	14.2125	0.00146965	0.00343876	IFITM1
1.75241	1.11661	26.3822	7.62123e-05	0.000250248	ENSG00000211772.7
1.74746	3.69555	222.808	2.27151e-11	5.99738e-10	CEBPB
1.7433	2.67655	166.96	2.30619e-10	4.26226e-09	LAMB3
1.73836	2.19326	243.051	1.11888e-11	3.35218e-10	TTN
1.73229	1.19351	124.106	2.34814e-09	3.17906e-08	LIF
1.73224	0.456947	63.3127	3.29307e-07	2.15961e-06	CA8
1.72906	8.71088	121.667	2.73553e-09	3.62808e-08	MX1
1.71512	3.51577	465.021	5.10909e-14	4.46058e-12	ENSG00000270607.1
1.71313	0.916567	99.2948	1.27766e-08	1.32139e-07	RAPSN
1.70288	0.868708	41.6591	5.24782e-06	2.40057e-05	APCDD1L
1.68921	1.78176	11.8868	0.00298047	0.0064207	ENSG00000274735.1
1.66288	5.52663	100.705	1.14954e-08	1.20376e-07	OAS1
1.64985	3.46006	337.239	7.52029e-13	3.66511e-11	STX1A
1.64878	4.54142	433.094	9.29294e-14	7.18738e-12	FOSL1
1.62555	0.781298	13.0132	0.00210022	0.00471424	DSP
1.61658	7.07071	59.3245	5.15415e-07	3.18216e-06	IFI44L
1.61435	-0.6611	21.6748	0.000212632	0.000615035	LINC00565
1.59804	-0.327218	19.8719	0.000326266	0.000900172	RPSAP52
1.59314	1.30575	129.116	1.73013e-09	2.44746e-08	ENSG00000245025.2
1.58612	0.566294	35.1975	1.4736e-05	5.88717e-05	AFF3
1.58385	7.56417	967.686	1.0026e-16	6.46451e-14	SLC3A2
1.58076	10.7481	367.957	3.63815e-13	2.13064e-11	MMP1
1.57128	3.831	23.7445	0.000133381	0.000408907	MX2
1.56955	0.487069	62.5775	3.57039e-07	2.31061e-06	ADRB2
1.56065	1.12955	91.525	2.34251e-08	2.24973e-07	CSMD3
1.55274	7.64216	147.231	6.22111e-10	1.00264e-08	OAS3
1.54453	-0.10583	11.2027	0.00371448	0.00781733	TMEM158
1.53699	0.778642	63.0318	3.39607e-07	2.21898e-06	BTBD11
1.53682	0.943354	63.7677	3.13347e-07	2.07407e-06	LINC02516
1.5363	2.49778	195.049	6.65722e-11	1.48029e-09	MLIP
1.53414	6.80429	299.31	2.02195e-12	8.15137e-11	PTGS2
1.53355	0.626615	66.7647	2.27474e-07	1.56916e-06	ENSG00000228817.4
1.53092	-0.109348	26.4383	7.53398e-05	0.000247841	ENSG00000277511.1
1.5207	0.204759	54.8808	8.73859e-07	5.0246e-06	LCP1
1.51778	3.39753	279.613	3.54537e-12	1.25821e-10	RTL5
1.51501	0.937495	81.1263	5.66774e-08	4.75295e-07	ENSG00000248476.1
1.50906	7.09836	77.6989	7.74334e-08	6.18381e-07	OAS2
1.49944	0.23217	50.9985	1.42511e-06	7.69376e-06	RRAD
1.49464	3.5879	371.931	3.32611e-13	1.99721e-11	CDKN2B
1.4911	5.3099	594.233	6.42875e-15	1.00536e-12	PTGER4
1.4881	0.439428	49.9383	1.6368e-06	8.71102e-06	DNAH8
1.4868	1.58007	37.9022	9.42179e-06	4.00482e-05	LGALS3BP
1.48312	3.30106	253.344	7.97068e-12	2.51509e-10	VLDLR
1.47432	-0.552125	29.9522	3.77076e-05	0.000134154	ADIRF
1.47366	-0.353143	28.9405	4.5764e-05	0.000159703	KCNMA1
1.46988	2.21093	138.571	9.9942e-10	1.52441e-08	TENT5A
1.46832	-0.222492	33.5326	1.96402e-05	7.6148e-05	DHRS9
1.45936	3.3714	60.0157	4.76115e-07	2.96136e-06	RGS4
1.45834	1.38072	69.6983	1.68101e-07	1.20153e-06	LINC00622
1.45312	-0.829457	22.9045	0.00016068	0.000479881	MT1A
1.44841	1.11557	83.3095	4.67254e-08	4.01297e-07	PLEK2
1.44561	0.387525	42.5217	4.61291e-06	2.1439e-05	ENSG00000257605.2
1.44203	2.32353	227.508	1.91717e-11	5.18692e-10	ENSG00000225339.3
1.44198	8.48383	348.342	5.74381e-13	3.00515e-11	SLC7A11
1.44096	3.59737	271.9	4.46287e-12	1.52305e-10	ALDH1L2
1.43445	5.37809	181.039	1.21014e-10	2.48203e-09	IRF7
1.43189	-0.531539	30.7903	3.22235e-05	0.000116864	WWC1
1.42662	-0.618718	12.3475	0.00257824	0.00565434	CCDC148
1.4255	8.96731	318.065	1.22261e-12	5.38669e-11	IFI27
1.42187	4.86828	430.199	9.83141e-14	7.50805e-12	TRIB1
1.42164	-0.64814	17.986	0.000523198	0.00137449	ENSG00000233680.4
1.41284	7.43995	180.583	1.2348e-10	2.51035e-09	BST2
1.40911	-0.137916	22.2809	0.000184996	0.000542597	ENSG00000235385.1
1.40201	-0.241625	27.8564	5.65962e-05	0.000192454	GDF5
1.39759	1.01461	83.5141	4.58973e-08	3.95378e-07	LRRC66
1.39423	-0.349497	17.9245	0.000531565	0.00139339	ENKUR
1.39014	0.900548	70.7908	1.50589e-07	1.09506e-06	TNFSF9
1.38843	1.38832	116.47	3.82212e-09	4.8392e-08	GABRR2
1.37414	7.54107	135.552	1.18636e-09	1.75499e-08	ISG15
1.37191	4.15624	290.124	2.61553e-12	9.84697e-11	LINC02407
1.3715	4.53902	466.302	4.99209e-14	4.41258e-12	FBXL13
1.36959	2.47584	93.3896	2.01749e-08	1.97733e-07	PRSS3
1.34828	-0.434833	18.1545	0.000501034	0.00132167	ITGAX
1.34562	5.34418	73.1406	1.1941e-07	8.9697e-07	HERC6
1.3426	1.52186	102.523	1.00507e-08	1.08272e-07	LOC100506544
1.32465	1.43452	50.2354	1.57414e-06	8.40902e-06	LINC01583
1.32134	8.90267	657.401	2.7252e-15	5.7884e-13	DCBLD2
1.31993	0.233729	36.5425	1.17633e-05	4.84524e-05	DOCK2
1.31704	4.22137	45.1892	3.13238e-06	1.5308e-05	EPSTI1
1.31395	5.981	341.295	6.80874e-13	3.42386e-11	SLC7A5
1.31093	0.361901	48.4731	1.98945e-06	1.02728e-05	VDR
1.30711	-0.23745	26.5293	7.39479e-05	0.000243769	FERMT1
1.30388	-0.148418	32.1555	2.50944e-05	9.41273e-05	ENSG00000269998.1
1.29862	6.89808	504.472	2.57114e-14	2.79312e-12	SGK1
1.2961	2.57108	82.5065	5.01397e-08	4.26247e-07	NUPR1
1.29356	9.97759	888.756	2.07832e-16	9.85888e-14	SQSTM1
1.2925	0.330572	27.4093	6.18744e-05	0.000208115	ENSG00000249631.4
1.29115	0.31303	20.8448	0.000258264	0.000730832	CXCL3
1.28739	-0.471606	25.1872	9.7766e-05	0.000311254	ENSG00000260698.1
1.28487	4.49877	135.889	1.16371e-09	1.72851e-08	CXCL1
1.27837	5.55156	342.905	6.54722e-13	3.33955e-11	NRG1
1.27302	2.25429	35.614	1.37341e-05	5.54179e-05	HERC5
1.27128	0.623648	41.1825	5.64012e-06	2.55782e-05	SPDYA
1.27074	0.911172	51.1685	1.3941e-06	7.54924e-06	PTPRH
1.26951	-0.0768129	16.2978	0.000817597	0.00204163	FLRT3
1.26833	5.49282	1070.19	4.22594e-17	3.53761e-14	IFRD1
1.2575	1.05848	47.1837	2.37092e-06	1.1986e-05	ENSG00000226375.1
1.25004	5.63107	284.369	3.08548e-12	1.12014e-10	MMP10
1.24839	3.77521	316.238	1.2824e-12	5.63264e-11	PSTPIP2
1.24799	0.96963	47.5873	2.24338e-06	1.14346e-05	NKX3-1
1.24413	1.79792	93.212	2.04617e-08	1.99856e-07	NIPAL1
1.24322	-0.188447	25.4739	9.20335e-05	0.000294984	ENSG00000268225.1
1.24236	1.4781	76.5302	8.63517e-08	6.77064e-07	ENSG00000229953.1
1.2403	5.54147	25.3253	9.49556e-05	0.000303393	IFIT1
1.24004	1.08453	86.9081	3.42978e-08	3.09844e-07	LINC02454
1.23913	4.97528	394.8	2.01967e-13	1.34756e-11	PCK2
1.23186	1.7478	101.96	1.04752e-08	1.12153e-07	STXBP5-AS1
1.22793	6.36384	169.695	2.027e-10	3.84616e-09	IFITM3
1.21782	2.08073	63.7732	3.1316e-07	2.07379e-06	ARRDC4
1.21374	7.84941	461.644	5.43249e-14	4.68799e-12	AXL
1.21347	0.00347122	44.09	3.66636e-06	1.7544e-05	FIRRE
1.21061	0.101074	41.418	5.4423e-06	2.4808e-05	RPL13AP20
1.20942	1.51885	85.5529	3.84837e-08	3.40586e-07	FER1L6
1.20914	-0.605734	16.5317	0.000767449	0.00192995	FCGBP
1.20853	3.69549	217.994	2.71194e-11	6.86295e-10	SNHG8
1.206	3.07594	93.3555	2.02296e-08	1.98133e-07	TRIM16L
1.19794	0.960577	60.7628	4.37352e-07	2.75153e-06	CXCL5
1.19478	8.59067	437.468	8.54052e-14	6.72461e-12	GDF15
1.19459	3.96639	220.163	2.50272e-11	6.45222e-10	HK2
1.19382	-0.144889	25.8501	8.50752e-05	0.000275599	ENSG00000273143.1
1.19219	0.0602147	25.2034	9.74307e-05	0.000310396	ENSG00000272734.1
1.18892	1.96973	117.092	3.66955e-09	4.67934e-08	CCDC113
1.18811	0.119845	23.222	0.000149689	0.000450363	CFAP70
1.18016	0.136658	29.8329	3.85698e-05	0.000136811	ENSG00000238045.8
1.17233	2.92616	176.768	1.46431e-10	2.89827e-09	STX11
1.17219	5.75542	429.267	1.0012e-13	7.5387e-12	E2F7
1.1698	5.08029	20.7285	0.000265492	0.000749647	IFIT3
1.16857	9.5113	751.328	8.73482e-16	2.73678e-13	TXNRD1
1.16134	6.40682	459.739	5.62484e-14	4.82212e-12	PPP1R15A
1.15787	-0.243574	21.652	0.000213757	0.000617534	ENSG00000271225.1
1.15723	4.6916	269.14	4.85329e-12	1.64446e-10	HSPB8
1.15402	3.21295	11.3844	0.00350138	0.00740939	RSAD2
1.14912	4.50447	349.297	5.61439e-13	2.9592e-11	VEGFA
1.14748	2.2987	65.8721	2.49935e-07	1.71001e-06	ZNF596
1.1466	-0.696021	22.2757	0.000185216	0.00054313	ENSG00000267405.1
1.14645	1.44037	51.6739	1.30626e-06	7.13604e-06	BMPR1B
1.14539	5.2682	281.999	3.30572e-12	1.18498e-10	CDC42EP2
1.14371	3.98723	232.271	1.61974e-11	4.55544e-10	HPSE
1.13644	5.19607	479.276	3.96148e-14	3.7335e-12	IRAK2
1.13602	-0.182716	23.0742	0.000154698	0.00046394	MYH3
1.13536	1.66496	100.125	1.20046e-08	1.24973e-07	HOXB9
1.13411	5.91688	64.2947	2.95934e-07	1.98278e-06	IFI44
1.13379	-0.728503	11.3022	0.00359609	0.00759174	ENSG00000271984.1
1.13378	3.42558	144.189	7.32687e-10	1.15983e-08	SLC38A5
1.131	2.7912	46.4534	2.62273e-06	1.31192e-05	PAPPA
1.12684	7.61377	791.304	5.61114e-16	1.99186e-13	JAG1
1.12664	9.61544	359.726	4.3938e-13	2.45209e-11	CDKN1A
1.12619	0.320206	37.2621	1.04522e-05	4.37358e-05	GAREM1
1.12618	5.71574	216.535	2.86367e-11	7.07517e-10	DOCK10
1.12522	4.30331	418.783	1.23214e-13	8.9462e-12	EGFR
1.12467	0.480737	28.0675	5.42806e-05	0.000185779	ENSG00000203635.2
1.12455	6.71915	386.932	2.39017e-13	1.5185e-11	RAC2
1.12393	1.8685	78.9775	6.88342e-08	5.61686e-07	ADORA2B
1.11882	0.362763	28.3614	5.12301e-05	0.000176484	TAF7L
1.11808	5.92193	356.373	4.75053e-13	2.56079e-11	TNFAIP8L3
1.11632	4.18727	153.027	4.59311e-10	7.74461e-09	WDFY4
1.11626	4.23213	370.431	3.44019e-13	2.04843e-11	MAPKAPK3
1.11265	8.10786	225.409	2.06716e-11	5.52965e-10	CLDN11
1.11247	4.52787	475.219	4.25576e-14	3.90734e-12	INSYN2B
1.11	-0.264951	16.9714	0.000682259	0.00174032	CPED1
1.10598	-0.0854579	24.9567	0.000102663	0.000324667	ZCWPW1
1.10444	-0.225376	24.5537	0.000111898	0.000351141	ENSG00000168260.2
1.10138	0.7644	23.1428	0.000152352	0.0004577	CLIC2
1.0985	4.91181	116.285	3.86879e-09	4.89394e-08	APOL6
1.09769	2.90155	167.105	2.29038e-10	4.24406e-09	FGF16
1.08966	-0.61497	12.4926	0.00246445	0.00542736	ENSG00000230650.1
1.08663	4.20789	238.973	1.28458e-11	3.76926e-10	PLPP4
1.08098	0.29479	30.3961	3.46835e-05	0.000124642	DMRTA1
1.08065	2.19411	76.2131	8.89655e-08	6.9526e-07	NAGS
1.07922	4.99545	169.914	2.00634e-10	3.81714e-09	PLA2G4A
1.0785	2.65471	80.7322	5.8715e-08	4.90072e-07	ENSG00000272405.1
1.07743	5.51219	112.756	4.89392e-09	5.95769e-08	UBE2L6
1.07649	0.295677	24.3926	0.000115847	0.000361618	CD79B
1.0742	3.11413	27.0571	6.64204e-05	0.000221573	CXCL11
1.0734	0.33095	20.7258	0.000265668	0.000749907	ENSG00000234975.6
1.07119	6.52959	176.507	1.48165e-10	2.92445e-09	CCND2
1.07107	0.620863	23.5647	0.000138759	0.0004223	NEURL3
1.07095	4.02455	212.885	3.28634e-11	7.95372e-10	AIFM2
1.0707	0.807825	24.9706	0.00010236	0.000323995	LOC105376603
1.06843	7.75185	687.955	1.8513e-15	4.24932e-13	GARS
1.06371	8.74474	800.922	5.06089e-16	1.99186e-13	SRGN
1.06274	0.427314	28.3795	5.10488e-05	0.00017603	ABTB2
1.06163	9.77928	421.72	1.16197e-13	8.52371e-12	FTL
1.05835	4.52174	290.456	2.59096e-12	9.80637e-11	PSPH
1.04851	0.366726	22.9552	0.000158867	0.000475065	SSTR1
1.04846	1.69702	40.402	6.35512e-06	2.83332e-05	LINC01235
1.04571	-0.0935815	29.2378	4.32127e-05	0.000151617	ENSG00000226608.3
1.04438	-0.311007	14.9418	0.0011915	0.00285651	ENSG00000236671.6
1.04328	0.200116	16.3251	0.000811562	0.00202762	ANGPT1
1.04154	2.74186	52.8872	1.1195e-06	6.21842e-06	MT1L
1.03931	-0.525553	16.2532	0.00082757	0.00206363	KBTBD11
1.03888	5.46671	294.144	2.33469e-12	9.07788e-11	PMAIP1
1.03753	3.35241	34.1858	1.75265e-05	6.87297e-05	IFIT2
1.0341	-0.570447	17.9118	0.000533309	0.00139677	ZDHHC11
1.03269	5.758	502.123	2.67447e-14	2.85128e-12	PTGR1
1.03004	8.66171	265.12	5.49183e-12	1.82603e-10	HMGA1
1.02568	1.52831	32.5459	2.33938e-05	8.84713e-05	RNF182
1.02534	4.60828	219.323	2.58159e-11	6.5958e-10	TFEC
1.02513	9.28699	342.62	6.59267e-13	3.34905e-11	MDM2
1.02382	6.64383	66.536	2.33007e-07	1.60655e-06	KRT7
1.01557	0.177536	22.2945	0.000184422	0.000541137	WDR63
1.01524	7.22681	613.424	4.90863e-15	8.12813e-13	MARS
1.0145	0.437235	27.8019	5.72117e-05	0.000194222	KTN1-AS1
1.01267	0.216387	19.6076	0.000348041	0.00095231	ITGB1-DT
1.01228	2.43212	94.7909	1.80626e-08	1.78506e-07	MIR31HG
1.00949	2.8815	127.722	1.88154e-09	2.63286e-08	MCRIP2
1.0085	1.94867	37.0155	1.08821e-05	4.53345e-05	RELN
1.00706	4.11358	187.037	9.32264e-11	2.00106e-09	MAMDC2
1.00403	3.72955	175.787	1.53077e-10	3.0089e-09	LARP6
1.00206	2.24057	60.4833	4.51421e-07	2.82257e-06	VPS9D1-AS1
1.00198	3.28609	189.328	8.45566e-11	1.83155e-09	ZFAND2A
-1.00026	0.225093	20.9576	0.000251467	0.000713728	GABRP
-1.00099	3.20346	175.987	1.51691e-10	2.98577e-09	RFC5
-1.00115	5.22179	420.438	1.19203e-13	8.69939e-12	NASP
-1.00294	-0.620783	10.8994	0.00410325	0.00854328	ENSG00000254481.1
-1.00414	-0.28298	10.2214	0.00514941	0.0104508	MAATS1
-1.00457	1.76708	53.3894	1.05107e-06	5.89584e-06	EBF4
-1.00486	-0.514495	8.81219	0.00843758	0.0162088	SOX8
-1.00502	1.34889	57.4104	6.4449e-07	3.85044e-06	CENPP
-1.00507	6.43488	366.754	3.73892e-13	2.18068e-11	KIT
-1.00673	1.40419	51.3925	1.35437e-06	7.36776e-06	KCNN2
-1.00675	1.39966	29.5561	4.06565e-05	0.000143427	KCNJ2-AS1
-1.00692	0.839146	35.5541	1.38734e-05	5.58983e-05	ENSG00000280088.1
-1.00857	5.97327	333.43	8.26484e-13	3.92056e-11	SLC6A6
-1.00863	5.10574	31.4669	2.84419e-05	0.000104751	ENSG00000278047.1
-1.00942	3.96094	165	2.53268e-10	4.64466e-09	WDHD1
-1.01026	5.76113	256.459	7.21134e-12	2.33238e-10	HIST1H4H
-1.01069	1.85219	30.4976	3.40304e-05	0.000122635	ITGA1
-1.01069	4.24065	230.675	1.71322e-11	4.77119e-10	ABCA4
-1.01101	5.02767	383.029	2.60167e-13	1.62515e-11	YAP1
-1.01132	0.592355	39.3822	7.44645e-06	3.25762e-05	ZNF730
-1.01156	0.936904	32.9	2.19616e-05	8.39696e-05	RASA4
-1.01206	-0.492207	10.0931	0.00537944	0.0108727	ENSG00000226801.2
-1.01342	1.25634	35.4912	1.40213e-05	5.63692e-05	XYLT1
-1.01458	2.2243	69.5564	1.70538e-07	1.21407e-06	FZD2
-1.01513	3.59382	148.916	5.68968e-10	9.24313e-09	FANCG
-1.01523	0.548208	31.4093	2.87436e-05	0.000105698	SCML2
-1.01533	1.27943	44.05	3.68765e-06	1.764e-05	ADGRB2
-1.01729	2.34013	27.3725	6.23332e-05	0.000209411	NOTCH3
-1.01772	8.15946	423.055	1.13155e-13	8.387e-12	NUCKS1
-1.01828	1.03438	42.1443	4.87951e-06	2.25455e-05	PLVAP
-1.02017	3.31734	120.211	3.00041e-09	3.93175e-08	PTTG1
-1.02219	6.1563	430.259	9.81985e-14	7.50805e-12	HIST1H4F
-1.02264	3.13283	146.899	6.33222e-10	1.01824e-08	RMI1
-1.02367	4.97036	288.503	2.73931e-12	1.0205e-10	USP1
-1.02409	13.8137	234.597	1.49345e-11	4.27631e-10	HSPG2
-1.02457	9.18248	354.694	4.9412e-13	2.65352e-11	MYH10
-1.02803	2.70578	114.374	4.39037e-09	5.43077e-08	PTP4A3
-1.02865	8.92916	478.281	4.03146e-14	3.77446e-12	IGFBP4
-1.02901	-0.227018	16.5382	0.000766109	0.00192726	ENSG00000254810.1
-1.02902	7.12544	343.927	6.3871e-13	3.2696e-11	RGCC
-1.02918	-0.409752	12.5464	0.00242371	0.00535545	DLEU1
-1.02928	5.13859	166.637	2.34191e-10	4.31706e-09	HIST1H4B
-1.03148	0.882261	51.1447	1.3984e-06	7.56391e-06	ENSG00000267383.5
-1.03273	0.966598	33.2281	2.07217e-05	7.99162e-05	ENSG00000233351.1
-1.03473	7.31356	794.7	5.40958e-16	1.99186e-13	TM4SF18
-1.03769	4.893	154.957	4.16124e-10	7.09205e-09	HIST2H2BE
-1.0382	5.20101	60.8834	4.31427e-07	2.72026e-06	SOX18
-1.04064	4.2394	153	4.59937e-10	7.74599e-09	LPAR6
-1.0431	2.96527	137.848	1.04099e-09	1.57265e-08	DBF4B
-1.04357	1.47744	58.5528	5.63621e-07	3.42551e-06	ENSG00000281332.1
-1.04393	8.95761	488.134	3.39465e-14	3.30626e-12	TIMP2
-1.04593	2.63823	63.6192	3.18458e-07	2.09911e-06	GIMAP1
-1.05041	3.5768	87.3257	3.31121e-08	3.01291e-07	ALG10B
-1.05564	3.06384	25.2021	9.74583e-05	0.000310414	IL33
-1.05617	1.26817	54.5757	9.07219e-07	5.19333e-06	SHF
-1.05782	2.57433	99.0507	1.30141e-08	1.33915e-07	TMEM37
-1.05892	1.60846	75.6578	9.37571e-08	7.26719e-07	PSMC3IP
-1.05929	0.71804	42.5888	4.5672e-06	2.12613e-05	ENSG00000271897.1
-1.05948	0.129227	21.7518	0.000208879	0.00060578	ENSG00000260793.2
-1.06015	1.16096	20.939	0.000252574	0.000716441	AFAP1L2
-1.06083	4.56387	234.303	1.50878e-11	4.31154e-10	MMS22L
-1.0636	0.810637	56.3321	7.32846e-07	4.3167e-06	RCSD1
-1.06442	2.6005	70.5413	1.54402e-07	1.11935e-06	ITGB3BP
-1.06504	6.71125	618.143	4.59933e-15	7.92179e-13	HMGN2
-1.06506	0.452892	22.2992	0.000184226	0.000540783	LDLRAD2
-1.06518	2.25732	71.2682	1.43584e-07	1.05056e-06	DNMT3B
-1.06529	1.02581	30.3685	3.48631e-05	0.000125097	ENSG00000276564.1
-1.06663	2.33419	111.968	5.162e-09	6.19858e-08	SASS6
-1.06699	6.36886	379.351	2.82015e-13	1.7299e-11	RASGRP3
-1.06768	4.59478	293.939	2.34822e-12	9.10561e-11	CENPO
-1.06936	1.9433	115.709	4.01841e-09	5.06519e-08	PRDM1
-1.0784	2.21565	63.7907	3.12565e-07	2.07082e-06	ZNF366
-1.07934	1.91433	51.3508	1.36167e-06	7.39897e-06	LOC105375304
-1.07949	-0.151724	20.3752	0.000288879	0.000807353	ENSG00000273368.1
-1.07986	3.11298	215.141	3.01758e-11	7.37855e-10	DNA2
-1.0838	1.45151	58.6291	5.58634e-07	3.40031e-06	CEACAM21
-1.08444	0.907994	25.7906	8.61351e-05	0.000278462	MBOAT1
-1.08462	3.07854	128.569	1.78791e-09	2.52669e-08	ALG10
-1.08479	5.58391	511.337	2.29377e-14	2.53043e-12	ITGA10
-1.08632	-0.300743	16.438	0.000787125	0.00197246	SLC25A10
-1.08666	-0.250823	19.7498	0.000336131	0.000923451	FAM222A
-1.08819	2.99406	106.381	7.60854e-09	8.50566e-08	SUV39H1
-1.08918	3.59673	195.711	6.47829e-11	1.44957e-09	CDC25A
-1.0902	-0.576322	14.0567	0.00153808	0.00358122	ENSG00000231993.1
-1.09027	0.94297	35.3179	1.44381e-05	5.78785e-05	AKAP5
-1.09109	7.04999	496.609	2.93573e-14	3.02742e-12	SYNE2
-1.09211	4.88383	81.8952	5.29252e-08	4.4699e-07	ARHGAP28
-1.09737	1.63434	56.0374	7.59292e-07	4.4467e-06	ENSG00000228065.9
-1.09808	1.02607	38.7185	8.26858e-06	3.5766e-05	EFCAB11
-1.09977	0.0767877	19.5919	0.000349383	0.000955616	ENSG00000224029.1
-1.10313	-0.0223724	21.994	0.000197543	0.0005769	RASGRP2
-1.10331	6.11398	308.713	1.56551e-12	6.73074e-11	SPRY1
-1.10465	5.95728	185.804	9.83008e-11	2.09106e-09	HIST1H2BK
-1.10535	0.744351	14.5482	0.00133347	0.00315803	CD36
-1.10695	2.2665	54.3097	9.37448e-07	5.33419e-06	MYO15B
-1.10775	3.20251	166.925	2.31008e-10	4.26391e-09	C1orf112
-1.10842	3.1703	92.9355	2.09175e-08	2.04168e-07	LINC01963
-1.10868	0.141921	34.9674	1.53242e-05	6.09842e-05	ADORA2A
-1.10957	0.690185	37.8941	9.43411e-06	4.00865e-05	ENSG00000224886.2
-1.10962	3.16415	112.593	4.94802e-09	5.99789e-08	ENSG00000259953.1
-1.11108	2.75521	70.1391	1.60777e-07	1.15966e-06	ZNF93
-1.11116	0.563097	35.3574	1.4342e-05	5.75419e-05	SOX5
-1.1149	-0.238495	16.1728	0.000845889	0.00210305	ENSG00000251456.1
-1.1157	3.06125	155.978	3.95114e-10	6.79911e-09	ZNF714
-1.12182	0.610437	29.8054	3.87714e-05	0.000137389	LUM
-1.12224	1.71234	51.6579	1.30894e-06	7.14794e-06	GUCY1A1
-1.12252	3.62287	149.292	5.57815e-10	9.0723e-09	ZWINT
-1.12266	1.96767	112.319	5.04047e-09	6.08306e-08	REXO5
-1.12326	2.7022	91.5233	2.34284e-08	2.24973e-07	SLF1
-1.1277	1.47543	43.3249	4.09795e-06	1.93747e-05	PDK4
-1.12867	-0.0359724	22.6841	0.000168841	0.000501309	BDKRB2
-1.12915	2.70378	96.8419	1.54016e-08	1.55117e-07	C1orf21
-1.13	0.875889	48.8382	1.89425e-06	9.83119e-06	ENSG00000206417.7
-1.13041	2.25952	86.0274	3.69566e-08	3.30151e-07	FAM110D
-1.13112	3.54247	169.461	2.04935e-10	3.87823e-09	HIST1H2AK
-1.13526	-0.142405	14.0789	0.00152813	0.00356038	ANKRD26P1
-1.13697	5.98943	646.339	3.14829e-15	6.31033e-13	MCM7
-1.13747	0.801855	40.478	6.28121e-06	2.80653e-05	SLIT3
-1.1381	5.37346	501.096	2.7211e-14	2.85128e-12	MCM5
-1.13876	-0.621775	6.55405	0.0200087	0.0348524	VSTM2L
-1.13896	-0.384155	22.0909	0.000193203	0.000565154	OGDHL
-1.14041	-0.475353	12.5687	0.002407	0.00532142	ENSG00000234031.1
-1.14144	1.49951	54.3437	9.33526e-07	5.31826e-06	ZNF710-AS1
-1.14526	0.428201	27.7504	5.78009e-05	0.000196035	OLFML2A
-1.14792	1.5062	47.7003	2.20906e-06	1.1284e-05	ZNF519
-1.14862	3.26714	186.728	9.44697e-11	2.02165e-09	ENSG00000279348.1
-1.15362	1.7811	91.3066	2.38426e-08	2.28641e-07	CSRP2
-1.1555	2.28877	112.346	5.03142e-09	6.07828e-08	ZNF85
-1.15577	6.57933	516.458	2.10857e-14	2.36276e-12	PCDH12
-1.15616	0.199632	31.9812	2.58983e-05	9.66332e-05	KLRG1
-1.15658	2.71316	157.166	3.72145e-10	6.45854e-09	DDIAS
-1.15808	-0.0266155	16.0073	0.000885037	0.00219027	ENSG00000223656.1
-1.15854	3.06513	192.145	7.51028e-11	1.65447e-09	SHISA3
-1.16006	1.24934	63.2054	3.33198e-07	2.18212e-06	C5orf34
-1.16132	3.94362	132.839	1.38815e-09	2.02405e-08	PCDH19
-1.16537	3.79526	193.024	7.23974e-11	1.59735e-09	CD200
-1.16681	4.27671	139.692	9.38555e-10	1.44552e-08	HERC2P3
-1.16698	1.99957	76.8585	8.37358e-08	6.61289e-07	ENSG00000275764.1
-1.16742	3.57712	134.333	1.27269e-09	1.86911e-08	CENPJ
-1.1695	4.77424	222.134	2.3281e-11	6.1015e-10	MIS18BP1
-1.16972	6.26891	711.732	1.386e-15	3.56839e-13	STK38L
-1.172	0.577574	23.5848	0.000138145	0.000420792	PON3
-1.17237	-0.340712	17.0835	0.000662254	0.00169689	GJC2
-1.175	1.04806	59.227	5.2124e-07	3.21116e-06	CORO1A
-1.1751	3.45724	185.034	1.01623e-10	2.14889e-09	GMNN
-1.17609	-0.226569	23.1153	0.000153286	0.00046031	IL34
-1.17657	2.42244	94.7216	1.81611e-08	1.79355e-07	ENSG00000281881.1
-1.17674	9.37714	532.152	1.63711e-14	1.90306e-12	FAM198B
-1.17969	2.99047	199.885	5.46622e-11	1.2567e-09	EBF3
-1.1826	3.68854	163.083	2.77854e-10	5.02432e-09	LFNG
-1.18694	4.15395	229.584	1.78061e-11	4.87988e-10	RAMP2
-1.18766	7.47093	744.709	9.41977e-16	2.79276e-13	VASH1
-1.19316	0.387958	42.1907	4.84582e-06	2.2419e-05	KIF17
-1.19418	0.780247	38.0654	9.17755e-06	3.91035e-05	PCDH18
-1.19427	5.513	159.14	3.37218e-10	5.89551e-09	LIMCH1
-1.19652	0.0136823	32.785	2.24155e-05	8.53613e-05	B3GNT7
-1.19687	4.44843	368.476	3.5956e-13	2.11442e-11	TIMELESS
-1.20024	2.24136	50.1457	1.59278e-06	8.4958e-06	TSPAN2
-1.20561	3.87705	125.424	2.16458e-09	2.9705e-08	NRK
-1.20628	0.874279	53.7159	1.0091e-06	5.68956e-06	ENSG00000243175.1
-1.21012	4.90267	200.577	5.31616e-11	1.22418e-09	SMC2
-1.21489	4.80374	193.714	7.03523e-11	1.55948e-09	HIST1H4C
-1.22	1.0416	80.7814	5.84559e-08	4.88483e-07	PTCH2
-1.22068	-0.573837	18.2706	0.000486371	0.00128773	DPF1
-1.22406	3.97583	336.115	7.73191e-13	3.71732e-11	HIST1H3E
-1.22429	5.43468	735.868	1.04299e-15	3.02915e-13	POLE
-1.22576	-0.046629	28.6395	4.85191e-05	0.000168204	SYT16
-1.2267	4.09119	232.867	1.5863e-11	4.49344e-10	HIST1H2AD
-1.22798	-0.595485	17.0584	0.000666682	0.0017067	KISS1
-1.22969	3.30002	196.448	6.28546e-11	1.40864e-09	GINS4
-1.2304	0.334126	53.5606	1.02882e-06	5.78495e-06	ENSG00000230330.1
-1.23087	8.62233	580.469	7.8424e-15	1.16255e-12	DEPP1
-1.23106	5.68339	932.865	1.37259e-16	7.81333e-14	MEF2C
-1.23446	-0.286436	13.7202	0.00169846	0.00390859	ENSG00000279338.1
-1.23755	2.60942	164.023	2.65481e-10	4.82922e-09	CAMK4
-1.23793	2.79899	183.693	1.07715e-10	2.25758e-09	CCM2L
-1.25041	2.44376	191.961	7.56842e-11	1.66213e-09	POC1A
-1.2517	4.89687	230.29	1.73668e-11	4.81767e-10	DCAF12L1
-1.25237	-0.411059	19.073	0.000397249	0.00107415	HOXD4
-1.25328	2.04757	119.303	3.17992e-09	4.12144e-08	RAMP2-AS1
-1.25379	-0.536391	19.296	0.00037583	0.00102109	ENSG00000278231.1
-1.25501	-0.418509	13.6275	0.00174589	0.00399641	LINC01474
-1.25705	1.30704	76.592	8.5853e-08	6.75387e-07	ENSG00000261269.1
-1.26198	3.74174	132.554	1.4115e-09	2.0497e-08	GPRIN3
-1.26319	2.17211	146.668	6.41088e-10	1.02625e-08	ENSG00000261061.1
-1.26393	1.29251	58.1712	5.89299e-07	3.54751e-06	ENSG00000280123.1
-1.26956	3.12061	199.295	5.59802e-11	1.27669e-09	YPEL1
-1.27041	1.87678	107.652	6.95504e-09	7.93087e-08	ENSG00000260822.1
-1.27095	3.73461	239.022	1.28243e-11	3.76926e-10	RBL1
-1.27327	3.97986	291.566	2.51071e-12	9.56877e-11	C18orf54
-1.27451	6.02906	345.918	6.08759e-13	3.12753e-11	GAB1
-1.2772	4.99688	274.704	4.10176e-12	1.42719e-10	DLL4
-1.27734	0.248153	29.4482	4.15034e-05	0.000146269	ENSG00000272750.1
-1.28259	1.48795	68.0063	1.99884e-07	1.39302e-06	TEDC2
-1.28282	1.92288	108.313	6.6403e-09	7.63313e-08	CASP12
-1.28316	5.20235	150.417	5.25855e-10	8.65138e-09	GDF7
-1.28345	1.56961	75.9503	9.11981e-08	7.09202e-07	MMP28
-1.28355	5.15532	379.625	2.80318e-13	1.72693e-11	ST8SIA4
-1.28606	4.0622	323.817	1.05375e-12	4.81434e-11	IL3RA
-1.28771	1.28939	77.5125	7.87844e-08	6.26708e-07	MTFR2
-1.29016	2.56904	215.155	3.01588e-11	7.37855e-10	DLEU2
-1.29387	-0.430241	12.5989	0.00238468	0.00527537	CNN1
-1.29467	-0.154672	28.7142	4.7818e-05	0.000166056	NAALAD2
-1.29511	-0.0857978	23.0735	0.000154723	0.00046394	ZNF257
-1.29746	6.35747	411.583	1.42503e-13	9.99083e-12	SMC4
-1.29899	0.373085	47.0532	2.41385e-06	1.21814e-05	GPR160
-1.30123	2.26659	125.537	2.14967e-09	2.95289e-08	UBE2T
-1.30562	3.96699	203.731	4.68772e-11	1.09362e-09	CIP2A
-1.30596	0.669936	51.5457	1.32794e-06	7.24059e-06	ITPRIPL1
-1.30626	0.150006	33.2369	2.06894e-05	7.98133e-05	ENSG00000180581.7
-1.30721	4.89558	522.79	1.90222e-14	2.16564e-12	CCNF
-1.30735	2.78783	150.873	5.1349e-10	8.50209e-09	C14orf132
-1.31108	-0.28599	27.9774	5.5256e-05	0.000188754	HCRTR1
-1.31623	4.7209	359.751	4.39122e-13	2.45209e-11	INCENP
-1.31732	-0.405761	16.8351	0.000707477	0.00179531	ENSG00000260244.1
-1.3184	0.875841	46.3129	2.67452e-06	1.33361e-05	ENSG00000274204.1
-1.31886	-0.136074	22.949	0.000159086	0.000475622	PLPPR3
-1.31914	-0.173967	40.7695	6.00663e-06	2.70336e-05	PIPOX
-1.32136	3.50879	195.235	6.60652e-11	1.47279e-09	HIST1H2BF
-1.32162	6.49179	643.569	3.2654e-15	6.4432e-13	HIST1H1C
-1.324	5.89262	319.699	1.17177e-12	5.2604e-11	SEMA3G
-1.32628	2.49243	250.077	8.86383e-12	2.7422e-10	HAUS8
-1.32986	-0.0928247	30.204	3.59578e-05	0.000128669	ENSG00000233817.1
-1.331	5.17854	33.4936	1.97751e-05	7.65975e-05	COL1A2
-1.33298	-0.498119	18.2488	0.00048909	0.00129397	RNASE10
-1.33468	0.721313	61.9355	3.83404e-07	2.45444e-06	ENSG00000280079.1
-1.33616	3.25617	304.073	1.77451e-12	7.42736e-11	TONSL
-1.33698	-0.189969	35.832	1.32403e-05	5.37736e-05	ENSG00000278925.1
-1.33777	0.452873	60.6775	4.41594e-07	2.77209e-06	APOBEC3B
-1.34747	2.48512	95.7121	1.68088e-08	1.67629e-07	SPIN4
-1.34924	7.07127	840.211	3.36082e-16	1.49462e-13	PALD1
-1.34996	6.02994	668.059	2.37669e-15	5.12465e-13	DACH1
-1.35006	4.29134	397.77	1.89687e-13	1.28545e-11	STIL
-1.35469	3.42173	68.6668	1.86741e-07	1.31625e-06	GALNT15
-1.35518	4.62187	254.612	7.65132e-12	2.43049e-10	DIAPH3
-1.3553	0.126837	15.9556	0.000897677	0.00221901	EFNB3
-1.35551	4.58467	412.031	1.4121e-13	9.99083e-12	PDE3A
-1.35647	5.82584	621.929	4.36685e-15	7.67217e-13	H2AFX
-1.35728	2.29873	141.911	8.29851e-10	1.29919e-08	HSD17B2
-1.36302	3.2272	217.147	2.79894e-11	6.98801e-10	GPSM2
-1.36372	3.2688	133.487	1.3367e-09	1.95504e-08	CD302
-1.3684	2.05157	90.5094	2.54385e-08	2.42312e-07	CDKN1C
-1.36934	4.90808	287.56	2.81429e-12	1.04297e-10	KNTC1
-1.37341	2.48799	181.001	1.21215e-10	2.48203e-09	CDC7
-1.37924	1.41021	49.8405	1.65804e-06	8.80102e-06	ZNF467
-1.38329	6.05232	1208.26	1.48922e-17	2.11931e-14	TMPO
-1.3835	3.76182	331.323	8.71177e-13	4.09166e-11	SERTAD4
-1.38381	-0.512162	33.5346	1.96333e-05	7.6148e-05	ERP27
-1.38529	-0.0785934	41.1332	5.68253e-06	2.57459e-05	ENSG00000270062.1
-1.38794	3.414	130.842	1.56109e-09	2.22827e-08	RSPO3
-1.39997	1.08019	52.2265	1.21719e-06	6.70351e-06	CBLN2
-1.40093	4.28115	324.655	1.03137e-12	4.73467e-11	MELK
-1.40634	-0.161362	42.6909	4.49868e-06	2.1018e-05	ENSG00000267504.1
-1.40681	4.88445	485.391	3.55986e-14	3.40002e-12	FANCI
-1.41267	1.4526	78.1535	7.42457e-08	5.96944e-07	TRAIP
-1.41741	3.51305	206.705	4.17021e-11	9.84183e-10	GPR146
-1.42446	0.573939	69.7384	1.6742e-07	1.19846e-06	CMTM1
-1.42664	4.18482	180.488	1.24e-10	2.51732e-09	NPR1
-1.43092	3.2509	334.608	8.0262e-13	3.82522e-11	CDCA7
-1.43228	2.61869	179.546	1.29291e-10	2.59147e-09	ZNF100
-1.44227	-0.147169	49.8496	1.65605e-06	8.79376e-06	ELFN1
-1.44734	1.92474	162.366	2.87709e-10	5.16389e-09	LRRC4
-1.45046	-0.497425	18.7519	0.000430516	0.00115206	UNC5A
-1.45051	3.93629	322.986	1.07644e-12	4.89419e-11	HIST2H2AB
-1.45201	3.16493	255.022	7.551e-12	2.42408e-10	CHTF18
-1.45908	-0.409784	23.6828	0.000135201	0.000413597	S1PR4
-1.46261	0.0659153	30.6063	3.33466e-05	0.000120537	ENSG00000248810.1
-1.4662	5.41688	814.279	4.39385e-16	1.78654e-13	LMNB1
-1.46782	5.31146	437.851	8.47803e-14	6.72461e-12	CKAP2
-1.47457	2.90403	172.145	1.80858e-10	3.46872e-09	LOC100288637
-1.47638	3.92197	229.545	1.7831e-11	4.87988e-10	PPM1H
-1.47675	-0.075984	35.6085	1.3747e-05	5.54358e-05	KCNE3
-1.47807	0.589957	74.1604	1.08176e-07	8.22777e-07	TENT5B
-1.48089	4.79416	336.728	7.61577e-13	3.68639e-11	EHD3
-1.48345	3.54008	245.271	1.03879e-11	3.13233e-10	HIST1H3I
-1.48644	3.49728	245.204	1.0411e-11	3.13233e-10	MCM8
-1.49365	-0.349896	24.2177	0.000120311	0.000374054	FBLN1
-1.50361	2.63122	228.616	1.84286e-11	5.0049e-10	LMCD1
-1.50671	3.36658	240.57	1.21663e-11	3.62215e-10	ATP8A1
-1.51003	2.15773	91.0331	2.43771e-08	2.33139e-07	ENSG00000260841.1
-1.51138	2.01238	127.243	1.93702e-09	2.70252e-08	CENPH
-1.51669	6.83491	587.738	7.05695e-15	1.07987e-12	FBXO32
-1.51681	3.01029	207.338	4.06849e-11	9.61771e-10	HSPA2
-1.52166	3.15555	204.411	4.56334e-11	1.07043e-09	ZGRF1
-1.52646	4.03108	256.844	7.12331e-12	2.31972e-10	VWA1
-1.52815	-0.172776	18.7541	0.000430271	0.00115163	EGR3
-1.53003	2.95475	230.114	1.74753e-11	4.81868e-10	PARPBP
-1.53145	3.84448	358.195	4.55279e-13	2.50158e-11	FANCA
-1.53167	-0.0551015	48.9998	1.85377e-06	9.65628e-06	FAM72B
-1.53398	4.59026	630.963	3.86329e-15	7.04853e-13	NCAPG2
-1.534	0.0274778	31.0791	3.05445e-05	0.000111542	MYL4
-1.53515	5.20695	638.992	3.46965e-15	6.49692e-13	TACC3
-1.53872	4.91335	611.717	5.02618e-15	8.12813e-13	HLX
-1.54077	1.89013	140.55	8.9476e-10	1.38791e-08	PIF1
-1.54131	4.5858	285.21	3.01125e-12	1.0988e-10	PRR11
-1.54567	5.00637	1155.26	2.19023e-17	2.22637e-14	MCM2
-1.54587	1.22404	114.367	4.39239e-09	5.43077e-08	PABPC4L
-1.54755	5.11977	363.286	4.04732e-13	2.31315e-11	FOXM1
-1.55741	1.01971	77.1827	8.12395e-08	6.43361e-07	CIDEB
-1.55825	3.88375	438.304	8.40466e-14	6.72461e-12	AURKA
-1.55865	1.97293	131.615	1.49148e-09	2.14613e-08	CDKN3
-1.56679	5.50348	830.418	3.71521e-16	1.60216e-13	SEMA6D
-1.57312	1.59512	98.8763	1.31867e-08	1.35397e-07	CYP4X1
-1.57468	0.116846	86.1917	3.64436e-08	3.26181e-07	PPP1R14A
-1.57587	3.33513	168.149	2.17986e-10	4.09068e-09	ENSG00000232517.2
-1.57964	3.62078	506.933	2.46762e-14	2.70128e-12	FANCD2
-1.58634	1.2143	86.945	3.4191e-08	3.09524e-07	APOL4
-1.58717	4.16282	501.425	2.70609e-14	2.85128e-12	KIF22
-1.58779	2.31711	235.942	1.4255e-11	4.10653e-10	MTBP
-1.58915	1.89174	109.558	6.08943e-09	7.08574e-08	ZNF724
-1.58967	1.87924	90.5279	2.54e-08	2.42108e-07	ENSG00000280143.1
-1.59457	3.96784	449.69	6.77451e-14	5.66708e-12	FEN1
-1.61733	0.888705	56.9691	6.79132e-07	4.03538e-06	ENSG00000267194.1
-1.62251	5.58462	564.78	9.89252e-15	1.31435e-12	TPX2
-1.62492	5.47255	958.276	1.09021e-16	6.46451e-14	MCM4
-1.62718	4.03169	744.99	9.38959e-16	2.79276e-13	SULT1C4
-1.6312	-0.411109	38.949	7.97216e-06	3.46418e-05	ENSG00000278126.1
-1.63601	3.61818	292.426	2.45041e-12	9.4248e-11	HIST1H4A
-1.63926	4.15729	461.614	5.43544e-14	4.68799e-12	HMGB2
-1.64634	1.23555	138.31	1.01423e-09	1.54203e-08	MYBL1
-1.65604	1.79843	144.862	7.06478e-10	1.12209e-08	C17orf53
-1.65653	0.0746731	37.8735	9.46553e-06	4.01742e-05	AUNIP
-1.6572	0.518182	51.2187	1.38509e-06	7.5062e-06	FGFR3
-1.65822	1.46786	137.971	1.03376e-09	1.56671e-08	CCDC150
-1.65934	8.90647	557.754	1.09993e-14	1.39759e-12	UACA
-1.66032	2.66455	248.499	9.33491e-12	2.88167e-10	CEP128
-1.68722	2.6778	296.298	2.19816e-12	8.68944e-11	C21orf58
-1.68742	3.61338	531.41	1.65655e-14	1.90306e-12	CENPI
-1.6895	4.57855	926.754	1.4521e-16	7.94801e-14	ARHGAP11A
-1.68992	2.99301	230.215	1.7413e-11	4.81868e-10	GPR137C
-1.69306	4.06621	330.881	8.80904e-13	4.11021e-11	PCDH17
-1.69521	3.21525	273.06	4.30946e-12	1.48433e-10	FBXO5
-1.69555	5.47889	492.125	3.16925e-14	3.1987e-12	SULF1
-1.70019	1.29673	81.8526	5.3126e-08	4.4842e-07	AQP1
-1.7019	0.828648	85.7401	3.78731e-08	3.36437e-07	ZNF726
-1.70646	3.28489	331.073	8.76657e-13	4.10385e-11	FAM83D
-1.71365	0.367082	78.6014	7.12473e-08	5.76091e-07	ITGA9
-1.71806	1.02399	103.54	9.33171e-09	1.01374e-07	DSCC1
-1.72677	2.865	160.047	3.22405e-10	5.68475e-09	IGF2
-1.72735	5.66669	543.268	1.37442e-14	1.65758e-12	HIST1H4D
-1.72747	4.13213	285.591	2.97828e-12	1.09192e-10	KIF20B
-1.72765	1.09874	107.37	7.09479e-09	8.05168e-08	RMI2
-1.73264	3.53163	306.799	1.64822e-12	7.00173e-11	PLK4
-1.73655	3.71046	393.823	2.06201e-13	1.36486e-11	TRIP13
-1.74313	2.60891	215.963	2.92569e-11	7.20338e-10	RAD51
-1.74372	3.78325	562.407	1.02518e-14	1.32631e-12	GINS1
-1.74395	2.85806	429.799	9.90847e-14	7.50805e-12	SPC24
-1.74877	4.87592	642.516	3.31116e-15	6.4432e-13	CCNB1
-1.75118	4.19675	416.006	1.30286e-13	9.41168e-12	CASP17P
-1.75398	2.48132	334.554	8.03696e-13	3.82522e-11	WDR62
-1.75836	-0.625726	21.2464	0.000234948	0.000671933	ZNF732
-1.76136	2.3761	364.732	3.9154e-13	2.27429e-11	KIF24
-1.76172	5.01928	548.902	1.25949e-14	1.53194e-12	HIST2H2BF
-1.76215	0.911385	108.932	6.35976e-09	7.35221e-08	CPXM1
-1.76255	3.41941	389.222	2.27507e-13	1.45186e-11	SGO2
-1.76538	4.64807	902.351	1.825e-16	9.36651e-14	HIST1H3A
-1.76708	2.52015	217.555	2.75665e-11	6.90666e-10	TROAP
-1.76752	2.48117	183.291	1.09621e-10	2.28278e-09	GIPC3
-1.76919	3.24866	358.722	4.4974e-13	2.49524e-11	EMP2
-1.77375	2.35883	296.827	2.16601e-12	8.61021e-11	HASPIN
-1.77651	1.70263	179.754	1.28103e-10	2.57833e-09	PRIM1
-1.79201	3.87311	492.694	3.13851e-14	3.1903e-12	SPAG5
-1.79405	1.51944	173.362	1.70988e-10	3.30616e-09	POLE2
-1.802	4.77993	487.784	3.41522e-14	3.30626e-12	TK1
-1.80525	4.25187	289.294	2.67815e-12	1.00561e-10	CXCL12
-1.80915	4.10949	390.02	2.23643e-13	1.44667e-11	RACGAP1
-1.81301	8.88857	1417.44	3.76528e-18	8.93063e-15	CD34
-1.81304	4.65965	629.175	3.9576e-15	7.12919e-13	CIT
-1.82088	3.41806	209.854	3.69061e-11	8.81226e-10	MAD2L1
-1.8308	5.22498	714.283	1.34438e-15	3.54294e-13	PRC1
-1.83106	4.0932	376.035	3.03479e-13	1.85357e-11	MEOX2
-1.83204	2.44621	319.008	1.19297e-12	5.33872e-11	SKA3
-1.84502	8.89095	721.311	1.23673e-15	3.3846e-13	COL12A1
-1.84868	3.79935	229.789	1.76774e-11	4.85651e-10	BRCA1
-1.85758	4.8487	389.297	2.27141e-13	1.45186e-11	HIST1H2BH
-1.85893	2.8275	189.905	8.25143e-11	1.79276e-09	ORC6
-1.86601	0.74348	126.758	1.99497e-09	2.77521e-08	GNG7
-1.86807	3.38496	490.291	3.27068e-14	3.23229e-12	WDR76
-1.87055	5.11628	563.616	1.0067e-14	1.31435e-12	FABP4
-1.87581	-0.0434933	61.5077	4.02172e-07	2.55733e-06	ENSG00000280120.1
-1.87841	3.49439	337.786	7.4197e-13	3.63311e-11	TICRR
-1.88051	2.10227	232.832	1.58822e-11	4.49344e-10	NEK2
-1.88917	4.71201	641.626	3.35041e-15	6.4432e-13	HELLS
-1.89098	3.23683	356.553	4.73055e-13	2.56079e-11	ATAD5
-1.89325	1.15599	84.3506	4.26786e-08	3.73278e-07	GJA5
-1.89468	2.58749	199.178	5.62459e-11	1.27865e-09	CENPU
-1.89753	6.09931	404.354	1.6532e-13	1.12568e-11	A2M
-1.90662	0.783646	73.1415	1.19399e-07	8.9697e-07	TRIL
-1.90668	-0.123021	56.4761	7.20301e-07	4.24807e-06	KCTD8
-1.90716	3.01822	489.347	3.3243e-14	3.26262e-12	RFC3
-1.92164	2.9445	251.142	8.56096e-12	2.66589e-10	BLM
-1.92385	4.01452	625.844	4.14018e-15	7.36487e-13	KIF4A
-1.93013	-0.0807195	37.2369	1.04951e-05	4.39024e-05	AMPH
-1.93871	4.30849	336.339	7.68923e-13	3.70934e-11	PLK1
-1.96194	3.59987	353.684	5.05994e-13	2.68615e-11	HIST1H2BL
-1.96707	3.89402	382.993	2.60371e-13	1.62515e-11	SHCBP1
-1.96973	3.3559	173.275	1.71678e-10	3.315e-09	CCNB2
-1.97677	3.35286	225.229	2.08067e-11	5.55535e-10	GJA4
-1.97696	4.47078	313.386	1.38239e-12	5.99983e-11	BRCA2
-1.97832	4.83073	291.877	2.48867e-12	9.52051e-11	CENPE
-1.97935	3.66282	217.822	2.72942e-11	6.87673e-10	HIST1H4L
-1.98254	5.03796	541.94	1.40319e-14	1.66531e-12	HIST1H2BJ
-1.98775	1.6961	147.794	6.03766e-10	9.76386e-09	FANCB
-1.98868	2.90494	208.168	3.93927e-11	9.3433e-10	E2F8
-1.99481	3.03329	497.709	2.88145e-14	2.99313e-12	SAPCD2
-2.00309	4.20036	617.813	4.62026e-15	7.92179e-13	KIF26A
-2.00483	3.56617	247.568	9.62572e-12	2.95673e-10	KIF14
-2.03073	2.86923	332.914	8.37205e-13	3.95823e-11	CENPK
-2.03362	-0.487009	47.6027	2.23865e-06	1.14146e-05	MIR924HG
-2.03959	3.90979	789.904	5.69662e-16	1.99186e-13	DHFR
-2.04013	0.348288	101.501	1.08363e-08	1.14912e-07	EME1
-2.0488	6.49327	1166.57	2.01419e-17	2.20492e-14	ACE
-2.05002	2.1133	405.173	1.62538e-13	1.11206e-11	MXD3
-2.05825	1.07182	251.643	8.42246e-12	2.62851e-10	DDX12P
-2.06346	3.7594	648.896	3.04437e-15	6.1892e-13	HIST1H2BE
-2.07084	3.13961	275.303	4.02898e-12	1.4053e-10	HMMR
-2.07429	2.16967	294.695	2.2989e-12	8.96319e-11	PCLAF
-2.07796	1.64222	340.967	6.86343e-13	3.43921e-11	CENPM
-2.08335	4.42365	279.359	3.57204e-12	1.26452e-10	KIF20A
-2.09301	4.59614	296.887	2.16243e-12	8.61021e-11	CDC20
-2.09893	3.13065	435.294	8.9056e-14	6.9635e-12	RECQL4
-2.09961	3.49685	453.674	6.29004e-14	5.32819e-12	CDCA5
-2.10513	3.86917	414.913	1.33191e-13	9.57296e-12	CLSPN
-2.10585	0.438514	106.042	7.79459e-09	8.68636e-08	ENSG00000111788.10
-2.11082	5.38265	1830.58	4.14001e-19	2.94582e-15	AIF1L
-2.12731	-0.368008	76.0473	9.03665e-08	7.03889e-07	MND1
-2.13431	5.94274	563.954	1.0016e-14	1.31435e-12	ANLN
-2.1352	1.29389	215.408	2.98738e-11	7.3299e-10	CDC25C
-2.14447	4.31155	392.082	2.1399e-13	1.40734e-11	KIF23
-2.14852	5.26019	1021	6.32887e-17	5.00368e-14	ATAD2
-2.18737	0.398692	131.11	1.53655e-09	2.19545e-08	ENSG00000226202.2
-2.18957	4.44287	585.663	7.27189e-15	1.10092e-12	CCNA2
-2.19936	4.27134	480.71	3.86299e-14	3.66495e-12	BUB1
-2.20479	3.96276	612.525	4.9701e-15	8.12813e-13	ESPL1
-2.21054	-0.585689	42.4857	4.63765e-06	2.15329e-05	ENSG00000269974.1
-2.21983	2.62691	410.456	1.45818e-13	1.01722e-11	GINS2
-2.2235	2.12436	293.034	2.40876e-12	9.28971e-11	ORC1
-2.22799	5.01186	985.505	8.57379e-17	6.10068e-14	HIST1H3H
-2.23159	-0.530101	33.1513	2.10047e-05	8.07669e-05	SLITRK5
-2.23183	-0.360075	38.8076	8.15253e-06	3.53177e-05	KLRD1
-2.23347	5.0695	1134.55	2.55863e-17	2.42746e-14	UHRF1
-2.23884	2.82276	364.368	3.94822e-13	2.28403e-11	KIF18A
-2.24021	-0.000687902	63.6114	3.18729e-07	2.09992e-06	SNAP25
-2.24473	5.1793	789.225	5.7386e-16	1.99186e-13	IQGAP3
-2.24577	3.02849	467.428	4.8917e-14	4.35969e-12	CDC45
-2.2468	4.48403	353.731	5.05439e-13	2.68615e-11	DLGAP5
-2.24976	4.22284	674.436	2.19208e-15	4.87429e-13	NUSAP1
-2.25787	1.20102	253.351	7.96871e-12	2.51509e-10	RTKN2
-2.27233	3.82767	691.12	1.78033e-15	4.2033e-13	CDC6
-2.27371	1.157	255.593	7.41393e-12	2.38705e-10	LOC441179
-2.27687	4.6698	690.152	1.80171e-15	4.2033e-13	BIRC5
-2.27786	2.47266	322.394	1.09296e-12	4.93775e-11	XRCC2
-2.28627	-0.478826	58.6758	5.55609e-07	3.38479e-06	ENSG00000241634.1
-2.29412	1.96223	278.595	3.6535e-12	1.28695e-10	PSRC1
-2.30695	4.56711	582.293	7.63657e-15	1.14396e-12	HIST1H2BI
-2.30779	5.71128	750.212	8.8463e-16	2.73678e-13	CENPF
-2.3186	2.55837	253.068	8.04209e-12	2.53201e-10	CDKN2C
-2.32198	1.48265	227.437	1.92206e-11	5.1903e-10	NEIL3
-2.32892	0.0616972	83.7234	4.50673e-08	3.90117e-07	ARHGEF39
-2.33406	3.24215	332.303	8.50062e-13	4.00571e-11	POLQ
-2.34101	4.02419	655.459	2.79463e-15	5.84859e-13	HIST1H2AB
-2.35068	2.04476	256.498	7.20244e-12	2.33238e-10	CENPA
-2.35809	3.98552	779.09	6.40837e-16	2.17137e-13	TCF19
-2.35905	0.915604	97.3316	1.48329e-08	1.50347e-07	OIP5
-2.37011	5.19379	710.644	1.40419e-15	3.56839e-13	MYBL2
-2.37878	3.74331	220.878	2.43779e-11	6.31915e-10	DEPDC1
-2.39043	4.83153	589.245	6.90532e-15	1.06815e-12	HIST1H3D
-2.39692	4.15142	395.114	2.00631e-13	1.34678e-11	HIST1H2AI
-2.39693	4.87634	573.624	8.67214e-15	1.22191e-12	KNL1
-2.40216	4.63089	304.294	1.76389e-12	7.41923e-11	KIF11
-2.40764	3.36605	569.691	9.19286e-15	1.27013e-12	E2F1
-2.41108	4.49969	612.369	4.98091e-15	8.12813e-13	NCAPG
-2.42004	4.03847	379.923	2.78484e-13	1.72309e-11	GTSE1
-2.42065	3.91541	576.169	8.35276e-15	1.20069e-12	HJURP
-2.4227	3.57681	556.155	1.12699e-14	1.41931e-12	CDCA8
-2.43057	3.17358	728.479	1.13673e-15	3.22257e-13	CDT1
-2.48438	4.47702	668.821	2.35372e-15	5.12465e-13	HIST1H4I
-2.48575	2.23227	307.123	1.63388e-12	6.98251e-11	PIMREG
-2.48905	3.65645	347.176	5.90644e-13	3.04545e-11	KIF2C
-2.48944	2.1738	407.52	1.54858e-13	1.0698e-11	CDCA3
-2.49198	3.03537	571.114	9.00055e-15	1.25575e-12	SKA1
-2.4947	3.48224	565.291	9.81705e-15	1.31435e-12	BUB1B
-2.50808	3.29047	348.856	5.67375e-13	2.97945e-11	CKAP2L
-2.50842	0.697015	177.23	1.43411e-10	2.84245e-09	ENSG00000276672.1
-2.51079	2.36715	274.068	4.18078e-12	1.44942e-10	RAD51AP1
-2.51674	0.928726	175.452	1.5542e-10	3.04235e-09	TMPO-AS1
-2.51856	2.54753	254.823	7.5995e-12	2.42408e-10	EXO1
-2.5398	2.98606	494.057	3.0662e-14	3.13922e-12	KIF15
-2.54009	5.25573	1168.87	1.9804e-17	2.20492e-14	HIST1H1D
-2.54381	2.96439	610.712	5.0968e-15	8.14973e-13	CCNE2
-2.56423	3.16663	441.294	7.93794e-14	6.41846e-12	UBE2C
-2.57564	4.24979	797.845	5.23009e-16	1.99186e-13	CEP55
-2.57833	2.87153	7.59679	0.013266	0.0241757	MIR3648-2
-2.58882	5.65017	727.127	1.15488e-15	3.22257e-13	HIST1H2AG
-2.61097	3.40319	382.143	2.6525e-13	1.64837e-11	BRIP1
-2.61373	2.88903	307.771	1.60563e-12	6.88243e-11	PBK
-2.62292	1.47824	257.102	7.06492e-12	2.30598e-10	HIST1H1A
-2.62332	3.17197	552.467	1.19232e-14	1.47437e-12	NCAPH
-2.63338	3.62814	412.736	1.392e-13	9.90475e-12	DTL
-2.63383	2.06216	217.039	2.81022e-11	7.0039e-10	RAD54L
-2.63385	3.96772	445.178	7.37417e-14	5.99667e-12	HIST2H3D
-2.64036	2.10617	475.428	4.24002e-14	3.90734e-12	DEPDC1B
-2.64813	2.72364	372.278	3.3003e-13	1.99011e-11	PKMYT1
-2.65548	3.35136	407.98	1.53404e-13	1.06492e-11	TTK
-2.6628	3.58045	750.747	8.79272e-16	2.73678e-13	CDCA2
-2.66855	3.03183	614.331	4.84742e-15	8.12813e-13	HIST1H2BB
-2.67196	4.70737	681.728	2.00031e-15	4.51847e-13	HIST1H2AH
-2.67754	3.6579	822.604	4.02797e-16	1.68594e-13	KIF18B
-2.68319	1.5047	245.849	1.01898e-11	3.09852e-10	SPC25
-2.68601	5.62182	561.24	1.04338e-14	1.33768e-12	ASPM
-2.69757	3.19204	446.406	7.2053e-14	5.89302e-12	NDC80
-2.70911	4.03362	491.653	3.19501e-14	3.20199e-12	CDK1
-2.71424	2.78686	389.604	2.25647e-13	1.45186e-11	NUF2
-2.72332	-0.768269	69.7031	1.6802e-07	1.20153e-06	FNDC5
-2.73624	-0.333503	99.4257	1.26513e-08	1.31225e-07	FBXO43
-2.75172	3.03822	305.293	1.71668e-12	7.2493e-11	AURKB
-2.76131	5.5048	1085.92	3.72802e-17	3.31584e-14	HIST1H3F
-2.76142	5.87204	602.718	5.70002e-15	9.013e-13	TOP2A
-2.81159	4.80864	1618.08	1.20186e-18	4.27593e-15	HIST1H2BO
-2.82066	5.47586	705.894	1.48678e-15	3.71198e-13	RRM2
-2.82495	3.05517	699.274	1.61104e-15	3.94632e-13	MCM10
-2.82725	3.14307	579.072	8.00427e-15	1.1728e-12	ASF1B
-2.82926	-0.617501	61.1683	4.17795e-07	2.64486e-06	ZNF695
-2.85394	2.37325	531.347	1.6582e-14	1.90306e-12	HIST1H2BM
-2.90657	2.16655	513.702	2.20607e-14	2.4527e-12	SGO1
-2.91138	2.23776	541.892	1.40424e-14	1.66531e-12	ZNF367
-2.93329	2.94244	386.458	2.41483e-13	1.52735e-11	HIST1H2AL
-2.94178	3.92959	551.951	1.20179e-14	1.47437e-12	KIFC1
-2.9441	1.94952	373.939	3.17987e-13	1.93388e-11	ERCC6L
-2.98095	-0.681632	62.2555	3.7e-07	2.37612e-06	NEURL1B
-2.9815	6.82947	652.033	2.92201e-15	6.02653e-13	MKI67
-3.05544	2.97436	347.43	5.87048e-13	3.03792e-11	ESCO2
-3.09912	4.96687	769.33	7.13662e-16	2.36189e-13	HIST1H3C
-3.10067	-0.281231	123.575	2.42693e-09	3.26442e-08	RIBC2
-3.12679	2.67709	578.46	8.07637e-15	1.1728e-12	MYCN
-3.19046	5.33835	959.217	1.08108e-16	6.46451e-14	HIST1H3B
-3.25474	1.67866	566.892	9.58464e-15	1.29904e-12	E2F2
-3.27024	5.71739	1299.12	7.97905e-18	1.26166e-14	HIST1H1B
-3.29025	5.04147	897.602	1.90934e-16	9.36961e-14	HIST1H2AJ
-3.30758	3.53978	968.603	9.94486e-17	6.46451e-14	FAM111B
-3.3311	-0.401459	62.2773	3.69107e-07	2.37252e-06	PRND
-3.44481	1.64727	503.65	2.60681e-14	2.81042e-12	HIST1H3J
-3.50041	4.70221	901.323	1.84289e-16	9.36651e-14	HIST1H3G
