# Supplementary material for: ELTD1 Activation Induces an Endothelial-EMT Transition to a Myofibroblast Phenotype
Source: Preprints.org preprint supplement (doi:10.20944/preprints202109.0402.v1), 2021-09-23
Supplement: Supplementary file 3 [file Table S3.xlsx]

## Sheet: 2019-08-09_edgeR_DE.significant
Table S3. RNA Expression changes at 120hrs
logFC	logCPM	F	PValue	FDR	gene_symbol
4.05827	0.987567	646.211	3.15361e-15	6.41128e-13	OLAH
3.65532	-0.60084	150.953	5.11358e-10	1.20482e-08	PURPL
3.49024	-0.590113	29.107	4.4315e-05	0.000231006	SPTB
3.04842	-0.350447	66.9637	2.2278e-07	2.39454e-06	PAPPA2
2.99179	1.12955	381.822	2.67122e-13	1.90071e-11	CSMD3
2.89485	-0.349497	49.9824	1.62733e-06	1.34956e-05	ENKUR
2.84123	1.26156	189.651	8.34083e-11	2.48056e-09	TG
2.80582	-0.327353	61.933	3.83508e-07	3.8139e-06	SORL1
2.76919	2.4985	261.633	6.12211e-12	2.56246e-10	STC1
2.75466	0.27984	155.975	3.95169e-10	9.64607e-09	KCNMB2-AS1
2.72147	-0.293109	67.9867	2.00289e-07	2.18415e-06	PINCR
2.68379	0.613301	164.25	2.62588e-10	6.78201e-09	ANKRD33
2.68151	1.19351	281.264	3.37761e-12	1.55054e-10	LIF
2.68081	-0.545686	57.3114	6.52085e-07	6.08513e-06	LONRF2
2.65668	0.0849909	169.325	2.06246e-10	5.44446e-09	ENSG00000240476.1
2.61652	0.242886	71.3491	1.42433e-07	1.6164e-06	GPNMB
2.61102	2.19326	582.77	7.58374e-15	1.24051e-12	TTN
2.55	1.34009	131.15	1.53296e-09	3.17086e-08	LAMB4
2.50586	1.51885	291.624	2.50661e-12	1.22163e-10	FER1L6
2.48691	0.706154	124.038	2.35814e-09	4.57827e-08	NAT8L
2.47868	0.23217	120.253	2.99237e-09	5.618e-08	RRAD
2.45327	2.20509	343.023	6.52847e-13	3.93672e-11	ULBP1
2.41308	-0.67369	34.0189	1.80413e-05	0.000107831	LINC00862
2.39114	-0.572357	54.6669	8.97097e-07	8.04955e-06	MYH14
2.36065	-0.269553	68.5486	1.8902e-07	2.07718e-06	ENSG00000240244.3
2.34945	-0.306668	49.2926	1.7828e-06	1.46147e-05	ANK2
2.31142	-0.0962849	104.183	8.90626e-09	1.45517e-07	GREB1
2.28174	2.04338	278.529	3.66059e-12	1.64854e-10	CLDN1
2.2627	-0.322389	30.7196	3.26496e-05	0.00017809	DIRAS1
2.26055	-0.728076	24.0729	0.000124153	0.000557883	RAB11FIP4
2.22904	2.11665	9.58302	0.00641585	0.0160888	ENSG00000276737.1
2.20136	0.520971	103.458	9.38718e-09	1.52261e-07	AADACP1
2.13668	10.7481	648.614	3.05562e-15	6.30211e-13	MMP1
2.12862	-0.513775	38.0316	9.22767e-06	6.10264e-05	ENSG00000231966.1
2.06795	-0.581561	49.1054	1.82781e-06	1.49149e-05	ENSG00000279142.1
2.02912	0.396299	117.372	3.60316e-09	6.57621e-08	LINC00520
2.02754	2.17009	231.467	1.66612e-11	6.07964e-10	DNAH11
2.02679	1.91039	347.81	5.81739e-13	3.56842e-11	ADAM12
2.02239	1.71797	122.881	2.53441e-09	4.86081e-08	XIRP2
1.98973	-0.618718	31.529	2.81206e-05	0.000156751	CCDC148
1.9868	1.37015	159.334	3.33976e-10	8.35291e-09	TMEM200A
1.9833	0.566294	66.7264	2.28391e-07	2.44931e-06	AFF3
1.96927	1.94867	203.37	4.75526e-11	1.53452e-09	RELN
1.95102	2.87064	230.185	1.74315e-11	6.32827e-10	ADM2
1.94565	0.896263	104.923	8.44386e-09	1.38598e-07	HS6ST3
1.93792	-0.232888	37.9597	9.33494e-06	6.15025e-05	ENSG00000230849.2
1.90163	1.45941	84.1595	4.3391e-08	5.72687e-07	NMRAL2P
1.90132	2.95376	128.646	1.77966e-09	3.61289e-08	EPS8L2
1.88129	-0.700888	30.551	3.36924e-05	0.000183006	IGDCC4
1.88061	-0.598173	48.2508	2.05001e-06	1.65666e-05	ENSG00000233370.1
1.87657	1.52017	89.8562	2.68349e-08	3.79118e-07	SLC6A9
1.87644	0.728202	98.6325	1.34325e-08	2.09308e-07	LRP1B
1.86836	0.718935	39.7274	7.0553e-06	4.82943e-05	FHDC1
1.83479	-0.30334	44.235	3.59041e-06	2.70488e-05	ENSG00000279266.1
1.83349	0.53046	110.835	5.57681e-09	9.51602e-08	BHLHE41
1.83112	5.83704	197.462	6.03033e-11	1.88196e-09	CXCL8
1.81012	1.55545	96.7193	1.55478e-08	2.35885e-07	ENSG00000257732.1
1.7519	0.295677	35.593	1.37827e-05	8.57265e-05	CD79B
1.7472	0.177536	58.2143	5.86337e-07	5.54429e-06	WDR63
1.74319	2.00671	149.904	5.40181e-10	1.26436e-08	ASXL3
1.7421	-0.657221	32.9745	2.16731e-05	0.000125276	DACT1
1.73321	2.21292	123.589	2.42485e-09	4.67589e-08	CPNE7
1.72744	0.362763	65.0821	2.71889e-07	2.83048e-06	TAF7L
1.72626	1.05848	92.3425	2.19333e-08	3.17854e-07	ENSG00000226375.1
1.70939	4.90954	540.949	1.42508e-14	1.89536e-12	ATF3
1.68998	0.427314	59.0567	5.31601e-07	5.07732e-06	ABTB2
1.67009	0.330572	65.8498	2.50526e-07	2.64484e-06	ENSG00000249631.4
1.66819	5.82563	542.066	1.40042e-14	1.88888e-12	CYFIP2
1.66762	-0.189051	57.7545	6.18848e-07	5.81693e-06	NPAS3
1.66461	-0.243574	52.0132	1.25074e-06	1.07419e-05	ENSG00000271225.1
1.6621	2.74186	125.945	2.09649e-09	4.1323e-08	MT1L
1.66156	4.00182	571.933	8.8918e-15	1.36259e-12	IL7R
1.65591	3.79896	356.107	4.78018e-13	3.06427e-11	FAS
1.65311	-0.578926	21.9379	0.000200108	0.000837143	NEFM
1.65214	-0.728503	14.8837	0.00121134	0.00386776	ENSG00000271984.1
1.63356	-0.315587	32.3802	2.40993e-05	0.000137513	TSPEAR-AS1
1.63242	0.943354	65.9638	2.47516e-07	2.61888e-06	LINC02516
1.6279	0.107018	52.9213	1.11469e-06	9.6963e-06	TMEM236
1.61544	0.141638	48.2225	2.05788e-06	1.66207e-05	MAP6
1.59439	2.42292	212.414	3.34576e-11	1.13366e-09	CPE
1.59109	4.67725	344.793	6.2548e-13	3.80393e-11	SERPINE2
1.58803	0.778642	84.1503	4.34259e-08	5.72687e-07	BTBD11
1.58204	2.68537	233.132	1.57166e-11	5.77941e-10	CLDN14
1.57992	0.950863	84.9105	4.06648e-08	5.42362e-07	IL31RA
1.55857	-0.525553	40.8754	5.91014e-06	4.13507e-05	KBTBD11
1.54868	5.2288	601.073	5.8338e-15	1.02495e-12	STC2
1.5414	0.387893	51.0945	1.40751e-06	1.18874e-05	MAF
1.53828	-0.434833	19.4798	0.000359155	0.00137767	ITGAX
1.51895	0.0152532	45.1985	3.12823e-06	2.39644e-05	AKAP6
1.5146	3.77521	460.013	5.59672e-14	5.41816e-12	PSTPIP2
1.5138	9.61544	637.372	3.54533e-15	7.10613e-13	CDKN1A
1.50471	6.21188	441.251	7.9444e-14	6.936e-12	FAT1
1.50426	-0.605734	31.0387	3.07735e-05	0.000169293	FCGBP
1.5023	1.01461	89.3384	2.80027e-08	3.93392e-07	LRRC66
1.501	-0.148418	44.2522	3.58152e-06	2.69961e-05	ENSG00000269998.1
1.50053	-0.191725	41.8435	5.10432e-06	3.64291e-05	LAMA1
1.49542	1.58007	47.7001	2.20911e-06	1.76915e-05	LGALS3BP
1.47187	0.175013	40.0695	6.69001e-06	4.60598e-05	DISP2
1.46748	2.48278	133.688	1.32116e-09	2.78127e-08	C1QTNF1
1.46716	-0.00271089	44.019	3.70422e-06	2.77885e-05	SOX6
1.46124	2.32353	217.394	2.77321e-11	9.71456e-10	ENSG00000225339.3
1.46073	5.63107	407.368	1.55346e-13	1.21403e-11	MMP10
1.45577	1.33308	71.831	1.35787e-07	1.55212e-06	ENSG00000233695.2
1.44648	3.39753	242.563	1.13738e-11	4.38648e-10	RTL5
1.44118	5.37948	524.771	1.84236e-14	2.26022e-12	ANTXR1
1.43539	0.394589	69.2833	1.7534e-07	1.94486e-06	IFNE
1.43165	6.52959	374.423	3.14566e-13	2.19441e-11	CCND2
1.42694	1.41294	122.481	2.59877e-09	4.96418e-08	TCEA3
1.42207	2.00145	124.159	2.34049e-09	4.55021e-08	EDA2R
1.41981	1.32051	75.6175	9.41156e-08	1.118e-06	GEM
1.41436	0.162098	26.1891	7.93046e-05	0.000378846	MYOM3
1.41082	4.28596	355.349	4.86583e-13	3.07759e-11	ACTA2
1.4084	-0.28977	32.6275	2.30545e-05	0.000132194	ENSG00000250961.1
1.40518	3.51577	332.799	8.39595e-13	4.83736e-11	ENSG00000270607.1
1.39855	0.960577	83.9069	4.43533e-08	5.83356e-07	CXCL5
1.39	2.24727	136.97	1.09412e-09	2.35558e-08	REEP2
1.38375	0.119845	29.8272	3.86115e-05	0.00020549	CFAP70
1.38278	1.29958	81.9408	5.27116e-08	6.80722e-07	ENSG00000256325.1
1.38176	0.900548	101.851	1.05601e-08	1.69617e-07	TNFSF9
1.37897	3.20702	234.731	1.48653e-11	5.49554e-10	FOXF1
1.3783	0.29479	61.3989	4.07108e-07	4.01478e-06	DMRTA1
1.37801	2.21093	140.007	9.22185e-10	2.0369e-08	TENT5A
1.37663	1.34937	94.5634	1.83882e-08	2.72019e-07	KCTD16
1.37651	2.37594	97.6581	1.44667e-08	2.22088e-07	DDIT4L
1.37596	-0.241625	38.3708	8.73932e-06	5.82526e-05	GDF5
1.37227	1.10275	94.3008	1.8772e-08	2.76834e-07	GRIN3B
1.37172	3.1767	327.402	9.6172e-13	5.36715e-11	IL1A
1.36805	9.28699	599.633	5.95372e-15	1.03326e-12	MDM2
1.36464	4.1191	194.4	6.83808e-11	2.08378e-09	DUSP4
1.34344	6.97735	580.351	7.85601e-15	1.25617e-12	ATP1B1
1.33635	1.00829	68.6444	1.87171e-07	2.06163e-06	ARHGAP6
1.33603	2.7912	71.6753	1.37896e-07	1.57118e-06	PAPPA
1.3268	4.15547	142.573	8.00237e-10	1.79624e-08	HES2
1.32672	0.96963	56.3361	7.32501e-07	6.734e-06	NKX3-1
1.32491	0.911172	56.9497	6.80699e-07	6.32313e-06	PTPRH
1.30698	-0.0761772	51.3059	1.36959e-06	1.16154e-05	LOC101929719
1.29824	2.24408	92.6536	2.13936e-08	3.11301e-07	TNFRSF9
1.28634	-0.274656	18.242	0.000489935	0.00180115	LOC400499
1.28573	4.37823	427.407	1.03839e-13	8.79606e-12	APOBEC3C
1.28514	-0.6611	12.6647	0.00233674	0.00679071	LINC00565
1.28511	1.10756	71.6916	1.37674e-07	1.57116e-06	SH2D5
1.28466	3.59737	192.642	7.35612e-11	2.22734e-09	ALDH1L2
1.28465	-0.570447	20.769	0.000262952	0.00105596	ZDHHC11
1.28378	0.487069	39.0699	7.82136e-06	5.28021e-05	ADRB2
1.2828	2.97686	75.8336	9.22095e-08	1.09718e-06	DRAXIN
1.28237	1.29185	72.5148	1.26944e-07	1.46278e-06	CDC14B
1.28071	-0.210912	34.3371	1.7074e-05	0.000102827	INKA2-AS1
1.26934	-0.137916	31.4062	2.87603e-05	0.000159816	ENSG00000235385.1
1.26863	0.456947	38.1006	9.12587e-06	6.0461e-05	CA8
1.26785	8.59067	491.579	3.1991e-14	3.51529e-12	GDF15
1.26525	1.75961	92.2082	2.2171e-08	3.20645e-07	ASTN2
1.25999	1.38707	91.8339	2.28486e-08	3.29107e-07	ZNF578
1.25844	1.73875	125.441	2.16238e-09	4.24452e-08	EPHA5
1.25714	4.60828	350.654	5.43598e-13	3.37814e-11	TFEC
1.25231	6.5406	275.025	4.06259e-12	1.77346e-10	GPC1
1.24854	0.233729	36.6583	1.15404e-05	7.37123e-05	DOCK2
1.2457	6.59715	143.604	7.56364e-10	1.70854e-08	ZNF117
1.24071	1.7478	120.525	2.94083e-09	5.55052e-08	STXBP5-AS1
1.23387	4.33699	229.027	1.81613e-11	6.57643e-10	MAP1A
1.22978	5.92193	443.771	7.57308e-14	6.73578e-12	TNFAIP8L3
1.22867	5.83214	321.06	1.13119e-12	6.21543e-11	TGFBI
1.22183	0.147354	33.0964	2.12098e-05	0.000123098	ENSG00000259946.1
1.22053	3.16531	181.121	1.20576e-10	3.38446e-09	NEK10
1.21855	0.933604	38.4131	8.68054e-06	5.78879e-05	SHANK1
1.21842	3.5879	277.165	3.81155e-12	1.69507e-10	CDKN2B
1.21203	1.59656	62.7205	3.51449e-07	3.54212e-06	KIAA1324
1.21164	5.90511	128.964	1.74599e-09	3.54961e-08	LYPD1
1.21004	0.439428	45.1399	3.15437e-06	2.41473e-05	DNAH8
1.20933	-0.37882	11.1121	0.00382603	0.0103494	SLC16A14
1.20799	1.51107	94.3777	1.86587e-08	2.75448e-07	ADGRG4
1.20379	5.75542	450.068	6.72686e-14	6.32394e-12	E2F7
1.20172	3.831	25.6461	8.87727e-05	0.00041749	MX2
1.20171	1.29525	43.7546	3.84898e-06	2.86677e-05	HOXB8
1.19865	2.77505	96.4846	1.58319e-08	2.3943e-07	PTPRU
1.19835	1.65891	87.8401	3.17139e-08	4.36903e-07	NTM
1.19171	-0.225376	23.536	0.000139639	0.000617336	ENSG00000168260.2
1.19064	6.79965	554.316	1.15905e-14	1.64945e-12	TNS3
1.18914	2.74957	173.273	1.71696e-10	4.6102e-09	RENBP
1.18784	0.901927	61.0381	4.23962e-07	4.1581e-06	REEP6
1.1816	0.270697	36.8545	1.11735e-05	7.17677e-05	PCSK6
1.17858	2.18806	98.3192	1.37557e-08	2.13011e-07	CADM1
1.17416	1.76801	69.4601	1.72213e-07	1.91317e-06	C10orf111
1.17268	1.83799	27.7316	5.80177e-05	0.000291543	MYEOV
1.16798	4.11358	291.165	2.53937e-12	1.22689e-10	MAMDC2
1.16775	5.71254	403.509	1.68243e-13	1.29419e-11	ERV3-1
1.16553	6.68488	425.62	1.07556e-13	9.01497e-12	PLTP
1.16203	0.722323	27.8723	5.6418e-05	0.000284796	DGKI
1.16199	6.64383	82.0329	5.2283e-08	6.77015e-07	KRT7
1.15882	-0.264951	25.8203	8.56045e-05	0.000404596	CPED1
1.15598	0.595133	39.7447	7.03625e-06	4.82103e-05	ENSG00000261488.1
1.15405	4.99545	177.121	1.44117e-10	3.94411e-09	PLA2G4A
1.15249	-0.163558	16.8609	0.000702618	0.00244773	CLSTN2
1.14593	4.12501	113.531	4.64508e-09	8.1812e-08	ITGA4
1.14328	4.2899	367.423	3.68252e-13	2.47198e-11	VWCE
1.14289	2.592	99.771	1.23271e-08	1.94919e-07	PHLDB3
1.14088	1.96973	107.248	7.15585e-09	1.18966e-07	CCDC113
1.13977	0.560219	19.9292	0.000321742	0.0012517	DGCR6
1.13894	0.192295	17.4239	0.000605453	0.00215674	GGT1
1.13875	-0.106532	18.9379	0.000410882	0.00154734	NOV
1.13805	-0.83173	17.078	0.000663221	0.00233148	PLXDC2
1.13633	-0.219686	20.7261	0.000265649	0.00106432	PDZD7
1.12986	3.62107	186.828	9.40665e-11	2.72844e-09	CEACAM19
1.12628	-0.64814	16.4327	0.000788244	0.00270041	ENSG00000233680.4
1.12396	2.02227	86.1193	3.66687e-08	4.94628e-07	ELFN2
1.12301	8.09212	586.169	7.21873e-15	1.22297e-12	TNFSF15
1.11932	-0.480147	23.3348	0.000145989	0.000641224	C2orf16
1.11595	2.43212	130.271	1.61493e-09	3.32592e-08	MIR31HG
1.11317	2.15334	107.201	7.17993e-09	1.19227e-07	TMEM8B
1.11267	0.0648588	23.173	0.00015133	0.000661296	ENSG00000248682.1
1.11092	3.50174	139.96	9.24626e-10	2.0369e-08	TMEM35A
1.11036	4.15624	209.887	3.68598e-11	1.22846e-09	LINC02407
1.11028	3.20746	74.2041	1.07722e-07	1.26799e-06	SDC1
1.10955	6.6895	325.454	1.01056e-12	5.61771e-11	LAMC2
1.10742	1.38832	69.7369	1.67446e-07	1.86603e-06	GABRR2
1.10618	3.82431	244.433	1.06825e-11	4.17645e-10	CCDC69
1.10411	3.30831	147.542	6.11902e-10	1.41973e-08	LPXN
1.09842	-0.473906	20.8065	0.000260622	0.00104821	LINC02392
1.08945	-0.353143	29.682	3.96924e-05	0.000210691	KCNMA1
1.08457	4.20789	248.194	9.42916e-12	3.7274e-10	PLPP4
1.08397	1.01903	24.9773	0.000102215	0.000471516	LINC01480
1.07977	-0.471606	12.5704	0.00240573	0.0069656	ENSG00000260698.1
1.07084	1.66727	43.4509	4.02311e-06	2.97572e-05	RGS11
1.07077	0.950441	38.0086	9.26183e-06	6.11058e-05	TYMSOS
1.06753	4.53902	290.627	2.57846e-12	1.23966e-10	FBXL13
1.06737	-0.144889	21.1699	0.000239203	0.000973989	ENSG00000273143.1
1.06622	0.263949	23.8527	0.000130258	0.000582152	SLC7A8
1.06599	3.65166	85.8795	3.74253e-08	5.03878e-07	OSGIN1
1.06563	3.55228	168.61	2.13294e-10	5.59003e-09	FUCA1
1.06511	-0.135055	18.2662	0.000486922	0.00179146	ANKDD1B
1.06215	8.90267	431.451	9.59446e-14	8.17597e-12	DCBLD2
1.06204	0.620863	33.2125	2.07786e-05	0.00012093	NEURL3
1.06066	1.52831	42.2012	4.83821e-06	3.4862e-05	RNF182
1.05885	2.2987	50.7824	1.46565e-06	1.22982e-05	ZNF596
1.05815	0.204759	22.6855	0.000168789	0.000724377	LCP1
1.0577	-0.188447	21.2145	0.000236713	0.00096468	ENSG00000268225.1
1.05566	1.55685	61.1003	4.21002e-07	4.13192e-06	KIF26B
1.05181	0.0166972	27.3138	6.30717e-05	0.000312634	LRRIQ1
1.0511	1.13415	50.4089	1.5388e-06	1.28391e-05	LURAP1L-AS1
1.05004	-0.16782	30.0891	3.67445e-05	0.000197156	SUGCT
1.04967	-0.278453	15.8272	0.000929966	0.00309167	NKAPL
1.04806	0.776073	36.878	1.11304e-05	7.15464e-05	CCDC68
1.04569	3.27389	130.442	1.59861e-09	3.29708e-08	C3orf52
1.04305	-0.526864	7.04144	0.0164654	0.0359495	HOMER2
1.04064	6.81496	438.43	8.38436e-14	7.27548e-12	RRM2B
1.04004	5.07559	327.989	9.47525e-13	5.30875e-11	PIK3IP1
1.03917	-0.621775	19.6695	0.000342803	0.00132135	VSTM2L
1.03841	3.85997	92.9635	2.08708e-08	3.04629e-07	NOG
1.03811	-0.0610331	27.832	5.68707e-05	0.00028669	KCNG1
1.03186	0.599227	22.9755	0.000158148	0.000684909	LOC105371267
1.03008	5.08029	21.8363	0.000204841	0.000854113	IFIT3
1.02595	-0.354789	20.286	0.000295141	0.00116251	PARP8
1.02415	6.24678	301.285	1.91497e-12	9.80284e-11	NDRG1
1.02244	0.710953	27.3644	6.24344e-05	0.000309836	DRP2
1.02187	1.18111	46.1223	2.74664e-06	2.14766e-05	LINC02547
1.01913	0.296467	25.877	8.46e-05	0.000400513	LINC01776
1.01868	0.076783	12.9167	0.00216289	0.00635558	ENSG00000264379.1
1.01511	7.01731	299.4	2.01693e-12	1.01783e-10	NAV3
1.01113	1.46608	49.2491	1.79317e-06	1.46743e-05	WHRN
1.007	3.08221	107.631	6.96553e-09	1.16182e-07	LOXL1
1.00511	0.945579	23.6941	0.000134866	0.000598465	SLC37A2
1.00495	6.43824	190.938	7.89998e-11	2.37183e-09	PLAU
-1.00108	0.334126	30.8094	3.21094e-05	0.000175615	ENSG00000230330.1
-1.00502	7.81005	279.371	3.57081e-12	1.61835e-10	ALDH1A1
-1.01274	0.249923	14.9036	0.00120452	0.00385029	GATA3-AS1
-1.01343	5.52994	55.0725	8.53612e-07	7.71286e-06	FILIP1
-1.01512	4.26155	221.545	2.37886e-11	8.40037e-10	ASRGL1
-1.0154	-0.338247	14.4183	0.00138443	0.00433483	ANKLE1
-1.02057	2.15826	80.3594	6.07177e-08	7.63991e-07	TEDC1
-1.02175	5.08135	209.825	3.69473e-11	1.2285e-09	SNCAIP
-1.02224	-0.171258	11.1578	0.00376929	0.0102231	ENSG00000279281.1
-1.02242	4.03108	114.825	4.26054e-09	7.54126e-08	VWA1
-1.02301	0.77505	18.6925	0.000437007	0.00163315	NUP210
-1.02877	4.22384	196.323	6.31776e-11	1.95028e-09	SKA2
-1.02998	6.87319	541.769	1.40694e-14	1.88888e-12	H2AFZ
-1.03021	1.41021	27.7208	5.81414e-05	0.000292062	ZNF467
-1.03055	6.71125	569.699	9.1918e-15	1.36259e-12	HMGN2
-1.03089	-0.922191	9.93097	0.0056869	0.0145427	DPEP1
-1.0309	0.433349	24.2294	0.000120006	0.000540786	SNORD46
-1.03541	2.63823	65.1919	2.68713e-07	2.80561e-06	GIMAP1
-1.04043	3.20251	148.961	5.67631e-10	1.32209e-08	C1orf112
-1.04199	0.882002	31.0092	3.09415e-05	0.000169749	C2CD4A
-1.04201	4.97036	305.332	1.71489e-12	8.87439e-11	USP1
-1.04546	3.01163	9.59419	0.00639087	0.0160346	KCNAB1
-1.0508	-0.514649	9.04113	0.0077705	0.0189515	HIST2H2AA3
-1.05081	3.11298	202.976	4.83033e-11	1.5517e-09	DNA2
-1.05162	2.67153	117.95	3.47021e-09	6.38044e-08	ENSG00000250899.3
-1.05405	3.04372	123.748	2.40103e-09	4.64254e-08	CHAF1B
-1.05794	4.2379	127.854	1.86659e-09	3.74723e-08	GIMAP7
-1.06041	5.06113	224.661	2.12379e-11	7.59387e-10	HIST1H2BG
-1.0646	6.02994	420.078	1.20064e-13	9.8832e-12	DACH1
-1.06721	0.646364	19.1048	0.000394108	0.00149164	ENSG00000277159.1
-1.06781	5.00835	462.099	5.38762e-14	5.28768e-12	NCAPD3
-1.06793	9.18248	384.957	2.4947e-13	1.8251e-11	MYH10
-1.06985	2.48799	121.096	2.83611e-09	5.37425e-08	CDC7
-1.07417	1.22404	64.976	2.74997e-07	2.85834e-06	PABPC4L
-1.07498	5.04958	201.278	5.16868e-11	1.65293e-09	ECT2
-1.07742	5.58676	420.509	1.19034e-13	9.8832e-12	RRM1
-1.07761	2.84717	154.457	4.26856e-10	1.02785e-08	RFC4
-1.07783	3.78245	180.517	1.2384e-10	3.45563e-09	BARD1
-1.08361	3.6661	194.731	6.74534e-11	2.06436e-09	SUV39H2
-1.08477	-0.405761	15.7576	0.000948011	0.00314379	ENSG00000260244.1
-1.08555	2.63122	129.766	1.66415e-09	3.41247e-08	LMCD1
-1.08625	4.18482	121.573	2.75168e-09	5.24219e-08	NPR1
-1.10198	3.3671	228.342	1.86093e-11	6.72156e-10	VRK1
-1.10253	2.1133	127.521	1.90466e-09	3.79093e-08	MXD3
-1.10491	6.43488	484	3.64707e-14	3.93193e-12	KIT
-1.105	5.78491	389.568	2.25825e-13	1.68257e-11	HIST1H2AE
-1.10682	0.548208	38.6359	8.3778e-06	5.60793e-05	SCML2
-1.11062	5.98943	619.923	4.48835e-15	8.29528e-13	MCM7
-1.11191	4.15395	216.937	2.82096e-11	9.79147e-10	RAMP2
-1.1177	2.49243	184.91	1.0217e-10	2.92551e-09	HAUS8
-1.11905	-0.296477	20.3335	0.000291786	0.00115057	SLCO2A1
-1.1254	2.46535	69.991	1.63197e-07	1.82727e-06	AK5
-1.12594	0.367082	51.3065	1.36948e-06	1.16154e-05	ITGA9
-1.12764	3.01029	132.075	1.45165e-09	3.02467e-08	HSPA2
-1.13004	7.90389	563.565	1.00747e-14	1.46299e-12	HMGCS1
-1.13145	3.2688	99.9952	1.21216e-08	1.9231e-07	CD302
-1.13161	3.498	192.505	7.39826e-11	2.23534e-09	DBF4
-1.13597	2.31711	134.459	1.26344e-09	2.67559e-08	MTBP
-1.1393	4.95332	448.141	6.97402e-14	6.40817e-12	TNFRSF1B
-1.15488	0.721313	47.9119	2.14637e-06	1.72473e-05	ENSG00000280079.1
-1.15602	-0.340712	16.3964	0.000796018	0.00272115	GJC2
-1.15605	2.6778	144.296	7.28463e-10	1.65076e-08	C21orf58
-1.15859	4.7209	285.316	3.00203e-12	1.40996e-10	INCENP
-1.16002	6.36873	277.334	3.7925e-12	1.69188e-10	CRYBG1
-1.16207	5.31146	285.607	2.9769e-12	1.40745e-10	CKAP2
-1.16505	5.15569	606.937	5.37231e-15	9.55667e-13	MCM6
-1.16546	1.24934	66.4827	2.34317e-07	2.50343e-06	C5orf34
-1.1657	3.97583	274.629	4.11108e-12	1.78914e-10	HIST1H3E
-1.1673	5.37346	518.187	2.04983e-14	2.49326e-12	MCM5
-1.16796	3.25617	239.101	1.27899e-11	4.81531e-10	TONSL
-1.16917	2.56904	186.263	9.63742e-11	2.77071e-09	DLEU2
-1.17133	1.92474	81.5907	5.43768e-08	6.98408e-07	LRRC4
-1.17291	0.783646	44.3299	3.54168e-06	2.67809e-05	TRIL
-1.17303	3.45724	183.528	1.08493e-10	3.08794e-09	GMNN
-1.17638	1.9708	72.4437	1.27832e-07	1.47064e-06	ABCG2
-1.18145	1.00525	35.1286	1.49094e-05	9.16524e-05	IMPA2
-1.18211	4.88383	107.733	6.91576e-09	1.1565e-07	ARHGAP28
-1.18273	5.20235	139.741	9.35954e-10	2.05549e-08	GDF7
-1.18294	0.482779	15.0991	0.00113955	0.00366651	FST
-1.18499	2.95475	147.334	6.18715e-10	1.4317e-08	PARPBP
-1.18561	-0.0434933	30.5106	3.39479e-05	0.000184043	ENSG00000280120.1
-1.18872	3.73461	212.27	3.36421e-11	1.13492e-09	RBL1
-1.19635	1.59942	68.1364	1.97217e-07	2.1556e-06	RGS7BP
-1.19716	0.610437	41.3259	5.51877e-06	3.89572e-05	LUM
-1.19971	4.89687	199.402	5.57375e-11	1.75876e-09	DCAF12L1
-1.20613	-0.286436	17.4102	0.000607637	0.00216234	ENSG00000279338.1
-1.2074	0.153405	11.6209	0.00324445	0.0089741	DLGAP1
-1.20741	2.26659	111.366	5.37802e-09	9.2433e-08	UBE2T
-1.21005	5.79973	285.735	2.96592e-12	1.40694e-10	CHST1
-1.2129	0.126837	15.151	0.001123	0.00362309	EFNB3
-1.21395	4.09213	291.111	2.54326e-12	1.22689e-10	CHAF1A
-1.21691	3.74174	156.033	3.94013e-10	9.64607e-09	GPRIN3
-1.22249	-0.189969	17.724	0.000559864	0.00201656	ENSG00000278925.1
-1.22589	4.89558	460.141	5.58368e-14	5.41816e-12	CCNF
-1.2284	1.46786	87.6473	3.223e-08	4.42727e-07	CCDC150
-1.23166	3.81085	300.774	1.94205e-12	9.87047e-11	SHMT1
-1.2437	4.50477	361.571	4.21032e-13	2.77394e-11	HIST1H2BN
-1.24407	5.02767	574.6	8.54809e-15	1.35164e-12	YAP1
-1.24538	4.90267	217.275	2.78555e-11	9.71599e-10	SMC2
-1.24826	1.34889	84.6719	4.15098e-08	5.49975e-07	CENPP
-1.25097	0.0701129	20.8057	0.000260672	0.00104821	CYP26A1
-1.25336	0.509744	38.1993	8.98253e-06	5.96781e-05	LOC105369364
-1.25555	-0.075984	27.0663	6.62978e-05	0.000326352	KCNE3
-1.26007	1.7811	104.233	8.87464e-09	1.45167e-07	CSRP2
-1.26139	1.62377	53.6271	1.02032e-06	8.96307e-06	MEST
-1.2677	4.25	391.103	2.18516e-13	1.63668e-11	TMEM97
-1.27231	-0.585689	21.2915	0.000232481	0.000949066	ENSG00000269974.1
-1.27438	0.907994	28.9409	4.57605e-05	0.000237411	MBOAT1
-1.27537	3.15555	147.523	6.12544e-10	1.41973e-08	ZGRF1
-1.27608	5.11628	321.099	1.13006e-12	6.21543e-11	FABP4
-1.27696	6.20396	478.735	3.99938e-14	4.21594e-12	HIST1H1E
-1.27787	3.36658	182.861	1.11703e-10	3.16661e-09	ATP8A1
-1.27882	1.71234	71.9284	1.34487e-07	1.54098e-06	GUCY1A1
-1.28323	3.96699	201.738	5.0745e-11	1.62647e-09	CIP2A
-1.28627	3.06384	38.1958	8.98761e-06	5.9684e-05	IL33
-1.28907	3.414	117.121	3.66275e-09	6.64855e-08	RSPO3
-1.29146	3.51305	177.823	1.39636e-10	3.84364e-09	GPR146
-1.29191	0.888705	39.4226	7.39945e-06	5.02633e-05	ENSG00000267194.1
-1.29303	3.75064	181.195	1.20185e-10	3.38014e-09	GCNT1
-1.29395	3.16493	217.345	2.77832e-11	9.71456e-10	CHTF18
-1.2973	6.49327	481.591	3.8038e-14	4.07007e-12	ACE
-1.30019	1.79843	90.1297	2.62401e-08	3.72306e-07	C17orf53
-1.30821	5.17854	34.205	1.74686e-05	0.00010489	COL1A2
-1.30868	1.60846	115.536	4.06453e-09	7.26253e-08	PSMC3IP
-1.30951	-0.0807195	17.7692	0.000553337	0.00199659	AMPH
-1.31016	4.27671	181.448	1.18853e-10	3.34929e-09	HERC2P3
-1.315	3.49728	204.84	4.48685e-11	1.46115e-09	MCM8
-1.31735	8.88857	779.682	6.36691e-16	2.32327e-13	CD34
-1.3267	1.06695	82.0161	5.23611e-08	6.7741e-07	CHST6
-1.32751	0.911385	76.8081	8.4132e-08	1.01465e-06	CPXM1
-1.33022	1.4526	71.8982	1.34889e-07	1.54433e-06	TRAIP
-1.34645	0.882261	85.6007	3.83268e-08	5.14555e-07	ENSG00000267383.5
-1.34656	5.82584	609.521	5.18198e-15	9.33478e-13	H2AFX
-1.34838	0.398692	70.0613	1.62043e-07	1.81721e-06	ENSG00000226202.2
-1.34882	6.23019	717.852	1.28845e-15	3.39555e-13	ACAT2
-1.35875	1.15599	31.5388	2.80699e-05	0.000156652	GJA5
-1.3618	2.67709	141.79	8.35402e-10	1.8605e-08	MYCN
-1.36184	-0.172776	33.8282	1.86504e-05	0.00011082	EGR3
-1.36457	0.706101	32.2081	2.48578e-05	0.000141331	ACKR4
-1.36923	2.54078	118.1	3.43668e-09	6.34505e-08	SV2A
-1.37036	0.190102	51.6861	1.30421e-06	1.11473e-05	RPL39L
-1.37126	0.131875	27.4109	6.18547e-05	0.000307351	ZYG11A
-1.37159	1.63369	39.7717	7.00669e-06	4.8038e-05	TMEM88
-1.37166	3.30002	226.983	1.95354e-11	7.00898e-10	GINS4
-1.37314	5.10922	493.207	3.1111e-14	3.48614e-12	HIST1H2BD
-1.38363	-0.28599	37.716	9.70938e-06	6.36161e-05	HCRTR1
-1.3846	3.59673	309.437	1.53544e-12	8.0929e-11	CDC25A
-1.38615	4.88445	478.148	4.04096e-14	4.22741e-12	FANCI
-1.38637	2.66455	187.041	9.32085e-11	2.71258e-09	CEP128
-1.38961	0.592355	66.0464	2.4536e-07	2.59801e-06	ZNF730
-1.39283	3.96784	355.538	4.84432e-13	3.07759e-11	FEN1
-1.39727	1.89174	98.487	1.35815e-08	2.11003e-07	ZNF724
-1.39767	0.828648	66.4459	2.35228e-07	2.51127e-06	ZNF726
-1.39806	6.35747	479.65	3.93551e-14	4.17957e-12	SMC4
-1.40732	6.1563	784.339	6.05125e-16	2.26619e-13	HIST1H4F
-1.40993	-0.409784	17.7886	0.000550564	0.0019886	S1PR4
-1.41128	6.51655	347.385	5.8769e-13	3.58945e-11	SULT1B1
-1.41531	1.56961	91.7847	2.29394e-08	3.30081e-07	MMP28
-1.41765	4.58467	407.482	1.54981e-13	1.21403e-11	PDE3A
-1.42151	3.23671	87.3312	3.30967e-08	4.51581e-07	PNMA2
-1.42602	2.3761	247.453	9.66227e-12	3.80897e-10	KIF24
-1.42715	5.00637	977.162	9.22232e-17	9.19341e-14	MCM2
-1.43469	6.49179	747.022	9.17382e-16	2.83433e-13	HIST1H1C
-1.43704	1.29673	45.3073	3.08037e-06	2.36572e-05	AQP1
-1.43961	2.48512	118.353	3.38082e-09	6.27321e-08	SPIN4
-1.44387	4.20036	289.368	2.67248e-12	1.27197e-10	KIF26A
-1.45114	0.0350798	17.7532	0.000555644	0.00200237	THY1
-1.45206	5.76113	506.422	2.48872e-14	2.87943e-12	HIST1H4H
-1.45499	4.893	295.39	2.25461e-12	1.1258e-10	HIST2H2BE
-1.45511	0.780247	61.7089	3.93222e-07	3.89961e-06	PCDH18
-1.45762	3.2272	240.11	1.23578e-11	4.71485e-10	GPSM2
-1.4666	-0.0551015	43.3107	4.10647e-06	3.02324e-05	FAM72B
-1.4805	6.05232	1369.37	5.06909e-18	1.80346e-14	TMPO
-1.48132	3.84448	340.299	6.97615e-13	4.17133e-11	FANCA
-1.48486	1.28939	107.938	6.81699e-09	1.14402e-07	MTFR2
-1.49029	0.697015	73.6198	1.13977e-07	1.32921e-06	ENSG00000276672.1
-1.50337	0.0659153	40.7007	6.0702e-06	4.22628e-05	ENSG00000248810.1
-1.50366	4.29134	477.746	4.06967e-14	4.22741e-12	STIL
-1.51054	0.717818	60.5705	4.46979e-07	4.35384e-06	SLC29A2
-1.5171	3.69797	360.033	4.36263e-13	2.83491e-11	CKS1B
-1.52556	4.28115	382.877	2.6103e-13	1.88975e-11	MELK
-1.52916	-0.436597	36.4904	1.1865e-05	7.54556e-05	SP8
-1.54394	2.9816	377.106	2.96356e-13	2.07756e-11	CENPW
-1.55419	4.80374	294.653	2.30162e-12	1.14084e-10	HIST1H4C
-1.57104	1.09874	90.9595	2.45234e-08	3.50042e-07	RMI2
-1.57292	2.90403	187.347	9.19949e-11	2.68908e-09	LOC100288637
-1.57592	3.24866	280.774	3.4265e-12	1.5629e-10	EMP2
-1.58508	0.191483	69.6809	1.68397e-07	1.87517e-06	SLC25A34-AS1
-1.58722	4.09119	373.411	3.21759e-13	2.23364e-11	HIST1H2AD
-1.6037	2.24136	92.8193	2.11123e-08	3.07837e-07	TSPAN2
-1.60387	-0.632778	10.2208	0.00515051	0.0133413	TMSB15B
-1.606	1.23555	128.541	1.79094e-09	3.63062e-08	MYBL1
-1.60683	-0.485272	32.983	2.16404e-05	0.000125138	GDF3
-1.60863	0.669936	88.3988	3.02696e-08	4.1985e-07	ITPRIPL1
-1.61162	3.23683	276.543	3.88271e-12	1.72133e-10	ATAD5
-1.61745	-0.705393	26.4759	7.47611e-05	0.000360775	ENPP2
-1.62891	4.25187	234.402	1.50359e-11	5.54342e-10	CXCL12
-1.62973	-0.768269	25.9326	8.36278e-05	0.000396438	FNDC5
-1.63319	3.61818	281.875	3.31776e-12	1.5282e-10	HIST1H4A
-1.64071	4.71201	508.808	2.39187e-14	2.81311e-12	HELLS
-1.64496	5.47255	992.911	8.04056e-17	9.19341e-14	MCM4
-1.64792	-0.478826	44.2	3.60859e-06	2.71714e-05	ENSG00000241634.1
-1.65148	3.38496	382.147	2.65225e-13	1.8967e-11	WDR76
-1.65311	5.20101	156.121	3.92266e-10	9.62473e-09	SOX18
-1.66309	4.99688	431.909	9.50927e-14	8.15219e-12	DLL4
-1.66342	-0.136079	13.4886	0.00181971	0.00547029	FBLN2
-1.66555	3.01822	393.944	2.05672e-13	1.55687e-11	RFC3
-1.66781	3.2509	443.223	7.65206e-14	6.7404e-12	CDCA7
-1.66993	4.15729	467.554	4.88057e-14	4.85702e-12	HMGB2
-1.67148	1.20102	157.37	3.68363e-10	9.10101e-09	RTKN2
-1.6797	0.438514	77.2632	8.06324e-08	9.7741e-07	ENSG00000111788.10
-1.68031	5.13859	407.226	1.55801e-13	1.21403e-11	HIST1H4B
-1.6984	3.78325	537.558	1.50296e-14	1.96226e-12	GINS1
-1.70591	1.11661	26.314	7.72882e-05	0.000370957	ENSG00000211772.7
-1.70771	1.07182	178.533	1.35265e-10	3.73778e-09	DDX12P
-1.71882	-0.368008	53.4525	1.0428e-06	9.14366e-06	MND1
-1.72368	2.01238	160.682	3.12468e-10	7.85641e-09	CENPH
-1.7261	4.16282	584.233	7.42417e-15	1.23085e-12	KIF22
-1.73137	1.16084	35.513	1.397e-05	8.67016e-05	PLA2G3
-1.75472	4.59026	798.674	5.1839e-16	2.10777e-13	NCAPG2
-1.75532	4.64807	843.834	3.23939e-16	1.58965e-13	HIST1H3A
-1.76165	3.88375	544.002	1.3588e-14	1.85933e-12	AURKA
-1.76181	1.16096	79.9522	6.29924e-08	7.88869e-07	AFAP1L2
-1.76415	2.60891	215.127	3.01915e-11	1.03782e-09	RAD51
-1.76524	2.44376	352.189	5.24178e-13	3.28616e-11	POC1A
-1.76731	-0.349896	35.29	1.45066e-05	8.94858e-05	FBLN1
-1.77771	3.79935	211.502	3.46431e-11	1.16275e-09	BRCA1
-1.78452	3.61338	567.254	9.53298e-15	1.3986e-12	CENPI
-1.78695	1.70263	191.571	7.6929e-11	2.31944e-09	PRIM1
-1.79268	4.62187	405.477	1.6152e-13	1.24923e-11	DIAPH3
-1.79464	3.13065	339.546	7.10601e-13	4.19608e-11	RECQL4
-1.80346	3.41941	408.994	1.50242e-13	1.20118e-11	SGO2
-1.80573	-0.000687902	48.452	1.99511e-06	1.61596e-05	SNAP25
-1.8106	0.97602	86.6088	3.51766e-08	4.7676e-07	FSTL5
-1.8198	1.6961	127.075	1.95681e-09	3.87847e-08	FANCB
-1.82047	3.62287	355.01	4.90463e-13	3.0884e-11	ZWINT
-1.82276	2.8275	185.751	9.85259e-11	2.82686e-09	ORC6
-1.83137	2.5257	191.09	7.84988e-11	2.36177e-09	METTL7A
-1.83402	3.90979	629.293	3.95129e-15	7.70285e-13	DHFR
-1.84399	5.20695	870.986	2.47054e-16	1.46493e-13	TACC3
-1.84452	5.26019	745.258	9.3608e-16	2.83433e-13	ATAD2
-1.85374	1.89013	182.337	1.14295e-10	3.22724e-09	PIF1
-1.86728	4.47078	291.356	2.52568e-12	1.22672e-10	BRCA2
-1.87326	2.35883	308.53	1.57323e-12	8.256e-11	HASPIN
-1.8778	2.9445	237.663	1.34349e-11	5.03137e-10	BLM
-1.88098	-0.497425	65.5938	2.57436e-07	2.70774e-06	UNC5A
-1.88676	3.21525	339.65	7.08786e-13	4.19608e-11	FBXO5
-1.89254	4.83073	265.585	5.41335e-12	2.28597e-10	CENPE
-1.89355	5.41688	1257.96	1.0527e-17	2.98245e-14	LMNB1
-1.89538	-0.193723	11.3316	0.00356185	0.00973471	CDCP1
-1.90169	2.86923	307.624	1.61196e-12	8.3722e-11	CENPK
-1.91199	1.51944	189.627	8.34929e-11	2.48056e-09	POLE2
-1.91607	1.02399	133.284	1.35254e-09	2.83893e-08	DSCC1
-1.91783	0.348288	74.2617	1.07127e-07	1.26307e-06	EME1
-1.92929	3.31734	382.581	2.62721e-13	1.88975e-11	PTTG1
-1.92974	-1.4362	13.0465	0.00207904	0.00614983	NTSR1
-1.93137	5.0695	891.201	2.03001e-16	1.25604e-13	UHRF1
-1.93248	3.54008	373.037	3.24461e-13	2.24088e-11	HIST1H3I
-1.94011	4.13213	356.74	4.70992e-13	3.03289e-11	KIF20B
-1.94639	1.47824	144.357	7.26052e-10	1.64792e-08	HIST1H1A
-1.95268	4.65965	692.145	1.75799e-15	4.16966e-13	CIT
-1.95874	5.47889	532.056	1.63961e-14	2.0649e-12	SULF1
-1.96703	-0.617501	36.4602	1.19246e-05	7.57248e-05	ZNF695
-1.97438	3.71046	501.839	2.68728e-14	3.05942e-12	TRIP13
-1.97915	2.96439	415.058	1.32801e-13	1.07381e-11	CCNE2
-1.98181	1.2143	99.0453	1.30194e-08	2.04728e-07	APOL4
-1.98469	2.82276	293.089	2.40499e-12	1.18019e-10	KIF18A
-1.9851	2.58749	200.503	5.33203e-11	1.69375e-09	CENPU
-2.00638	3.50879	408.158	1.52843e-13	1.21403e-11	HIST1H2BF
-2.01191	0.928726	98.8353	1.32277e-08	2.07088e-07	TMPO-AS1
-2.01314	3.40319	255.551	7.42399e-12	3.01859e-10	BRIP1
-2.01352	4.10949	449.848	6.75454e-14	6.32394e-12	RACGAP1
-2.02062	3.93629	571.732	8.91842e-15	1.36259e-12	HIST2H2AB
-2.02822	4.8487	444.696	7.44152e-14	6.66039e-12	HIST1H2BH
-2.05028	5.58462	844.05	3.2323e-16	1.58965e-13	TPX2
-2.05089	5.01928	725.719	1.17414e-15	3.2763e-13	HIST2H2BF
-2.05567	4.87592	860.908	2.72924e-16	1.49384e-13	CCNB1
-2.06278	3.7594	621.713	4.37977e-15	8.25996e-13	HIST1H2BE
-2.06809	5.03796	592.532	6.58699e-15	1.12939e-12	HIST1H2BJ
-2.06885	5.38265	1588.84	1.4067e-18	1.00094e-14	AIF1L
-2.08419	2.62691	357.775	4.59752e-13	2.97397e-11	GINS2
-2.08682	-0.333503	64.2457	2.97505e-07	3.04809e-06	FBXO43
-2.0905	8.89095	925.364	1.4709e-16	9.96779e-14	COL12A1
-2.09351	3.56617	261.184	6.20894e-12	2.58361e-10	KIF14
-2.09836	3.62078	826.765	3.85792e-16	1.6637e-13	FANCD2
-2.10246	2.36715	211.134	3.51352e-11	1.17649e-09	RAD51AP1
-2.10828	-0.281231	64.3394	2.94507e-07	3.02172e-06	RIBC2
-2.11162	1.48265	187.372	9.18978e-11	2.68908e-09	NEIL3
-2.12491	2.48132	475.358	4.2453e-14	4.34639e-12	WDR62
-2.12783	3.17358	570.859	9.03465e-15	1.36259e-12	CDT1
-2.13623	3.98552	662.317	2.55782e-15	5.71938e-13	TCF19
-2.14738	2.47266	292.629	2.43637e-12	1.19148e-10	XRCC2
-2.14782	4.57855	1437.22	3.34131e-18	1.58501e-14	ARHGAP11A
-2.15367	2.23776	336.99	7.56673e-13	4.43137e-11	ZNF367
-2.16094	3.36605	475.564	4.22979e-14	4.34639e-12	E2F1
-2.17379	3.82767	632.213	3.79887e-15	7.50856e-13	CDC6
-2.18363	2.90494	268.267	4.98456e-12	2.1366e-10	E2F8
-2.20498	0.0746731	64.9702	2.75168e-07	2.85834e-06	AUNIP
-2.21128	-0.487009	42.432	4.67479e-06	3.38904e-05	MIR924HG
-2.21238	1.157	255.557	7.42256e-12	3.01859e-10	LOC441179
-2.21441	3.66282	239.776	1.24991e-11	4.75602e-10	HIST1H4L
-2.21624	3.96276	610.203	5.13301e-15	9.33478e-13	ESPL1
-2.23139	4.5858	524.977	1.83623e-14	2.26022e-12	PRR11
-2.25783	5.66669	855.869	2.86982e-16	1.51261e-13	HIST1H4D
-2.26637	4.47702	581.404	7.73614e-15	1.25106e-12	HIST1H4I
-2.28184	-0.401459	53.684	1.01311e-06	8.90523e-06	PRND
-2.28532	1.96223	276.249	3.91687e-12	1.73109e-10	PSRC1
-2.30324	2.865	329.981	9.01061e-13	5.08849e-11	IGF2
-2.31212	3.49439	448.098	6.97959e-14	6.40817e-12	TICRR
-2.31709	5.01186	1047.74	5.06971e-17	8.01634e-14	HIST1H3H
-2.32059	4.31155	449.858	6.75327e-14	6.32394e-12	KIF23
-2.32278	3.49685	536.113	1.53758e-14	1.9892e-12	CDCA5
-2.33226	4.0932	533.541	1.60141e-14	2.03479e-12	MEOX2
-2.33742	2.06216	172.647	1.76713e-10	4.71821e-09	RAD54L
-2.3439	3.59987	472.843	4.43938e-14	4.51263e-12	HIST1H2BL
-2.34997	2.1738	355.681	4.82809e-13	3.07759e-11	CDCA3
-2.35823	3.28489	570.386	9.09838e-15	1.36259e-12	FAM83D
-2.38216	3.57681	538.762	1.47478e-14	1.9433e-12	CDCA8
-2.38497	3.53163	534.946	1.56619e-14	2.00797e-12	PLK4
-2.41211	3.87311	795.538	5.36107e-16	2.11926e-13	SPAG5
-2.42661	4.30849	491.359	3.21121e-14	3.51529e-12	PLK1
-2.4337	4.15142	407.128	1.56115e-13	1.21403e-11	HIST1H2AI
-2.43605	3.41806	342.543	6.60507e-13	3.96611e-11	MAD2L1
-2.43714	2.12436	329.704	9.07358e-13	5.1038e-11	ORC1
-2.45168	2.85806	737.79	1.02005e-15	3.02424e-13	SPC24
-2.45963	3.62814	367.772	3.65342e-13	2.47198e-11	DTL
-2.46196	5.25573	1111.24	3.05849e-17	5.44067e-14	HIST1H1D
-2.47508	3.86917	552.448	1.19267e-14	1.68048e-12	CLSPN
-2.48336	5.22498	1151.84	2.24668e-17	4.56751e-14	PRC1
-2.49373	3.35286	360.051	4.36083e-13	2.83491e-11	GJA4
-2.49925	4.44287	707.559	1.45723e-15	3.73423e-13	CCNA2
-2.50847	4.01452	972.166	9.63667e-17	9.19341e-14	KIF4A
-2.51648	4.83153	621.19	4.41119e-15	8.25996e-13	HIST1H3D
-2.52122	2.54753	254.513	7.67576e-12	3.10323e-10	EXO1
-2.53378	4.02419	748.663	9.0037e-16	2.83433e-13	HIST1H2AB
-2.53653	2.10617	437.83	8.48138e-14	7.31506e-12	DEPDC1B
-2.53795	2.72364	330.252	8.94931e-13	5.07401e-11	PKMYT1
-2.55218	3.24215	380.126	2.77247e-13	1.95324e-11	POLQ
-2.55701	3.19831	450.687	6.64951e-14	6.32394e-12	SULT1E1
-2.5738	3.16663	425.557	1.07691e-13	9.01497e-12	UBE2C
-2.57394	2.55837	265.394	5.44549e-12	2.29274e-10	CDKN2C
-2.57989	4.56711	699.129	1.6139e-15	4.00949e-13	HIST1H2BI
-2.60626	3.03329	769.629	7.11298e-16	2.53062e-13	SAPCD2
-2.63111	1.64222	446.616	7.17686e-14	6.46417e-12	CENPM
-2.63715	5.5048	981.671	8.86532e-17	9.19341e-14	HIST1H3F
-2.63865	0.915604	118.352	3.38104e-09	6.27321e-08	OIP5
-2.64508	3.02849	571.146	8.99625e-15	1.36259e-12	CDC45
-2.64623	5.65017	727.967	1.14357e-15	3.25484e-13	HIST1H2AG
-2.64786	3.92959	455.568	6.07331e-14	5.83982e-12	KIFC1
-2.65872	4.22284	862.554	2.68499e-16	1.49384e-13	NUSAP1
-2.65975	4.70737	661.883	2.57213e-15	5.71938e-13	HIST1H2AH
-2.67583	2.10227	384.844	2.50083e-13	1.8251e-11	NEK2
-2.68263	4.49969	721.382	1.23569e-15	3.38176e-13	NCAPG
-2.68469	2.16967	414.594	1.34055e-13	1.07782e-11	PCLAF
-2.6923	5.11977	897.058	1.91929e-16	1.24152e-13	FOXM1
-2.69971	3.65645	380.125	2.7725e-13	1.95324e-11	KIF2C
-2.70466	5.94274	834.369	3.56742e-16	1.63768e-13	ANLN
-2.70748	5.71128	955.318	1.11949e-16	9.19341e-14	CENPF
-2.71193	3.91541	656.571	2.75464e-15	5.94192e-13	HJURP
-2.72034	4.87634	698.108	1.63411e-15	4.00949e-13	KNL1
-2.73219	4.63089	370.212	3.45727e-13	2.35409e-11	KIF11
-2.73499	1.97293	317.902	1.22781e-12	6.66906e-11	CDKN3
-2.73682	3.6579	830.914	3.69628e-16	1.6438e-13	KIF18B
-2.74183	3.14307	544.579	1.34666e-14	1.85933e-12	ASF1B
-2.74449	3.3559	285.38	2.99649e-12	1.40996e-10	CCNB2
-2.75157	4.03362	496.118	2.96038e-14	3.34359e-12	CDK1
-2.75871	3.05517	649.463	3.02181e-15	6.30211e-13	MCM10
-2.76594	1.5047	243.889	1.08787e-11	4.22992e-10	SPC25
-2.77539	3.53978	755.468	8.33468e-16	2.82446e-13	FAM111B
-2.78691	2.52015	448.521	6.92446e-14	6.40817e-12	TROAP
-2.79177	2.78686	395.145	2.00499e-13	1.52583e-11	NUF2
-2.79834	4.03847	468.635	4.78658e-14	4.79703e-12	GTSE1
-2.7986	5.1793	1032.1	5.76803e-17	8.20849e-14	IQGAP3
-2.80602	3.03537	656.54	2.75572e-15	5.94192e-13	SKA1
-2.82009	4.6698	941.728	1.26576e-16	9.19341e-14	BIRC5
-2.83249	1.94952	363.69	4.00998e-13	2.66664e-11	ERCC6L
-2.84376	2.37325	514.187	2.18855e-14	2.61725e-12	HIST1H2BM
-2.85502	3.17197	624.474	4.21796e-15	8.1116e-13	NCAPH
-2.86292	2.23227	351.273	5.35673e-13	3.34349e-11	PIMREG
-2.86355	2.98606	584.103	7.4382e-15	1.23085e-12	KIF15
-2.86673	4.77993	970.292	9.79743e-17	9.19341e-14	TK1
-2.86729	2.44621	650.085	2.9973e-15	6.30211e-13	SKA3
-2.87337	3.03822	333.347	8.28211e-13	4.79117e-11	AURKB
-2.90455	4.27134	730.866	1.10546e-15	3.21058e-13	BUB1
-2.90509	3.89402	706.866	1.46945e-15	3.73423e-13	SHCBP1
-2.90849	5.19379	944.642	1.23268e-16	9.19341e-14	MYBL2
-2.90884	2.87182	11.1779	0.0037446	0.0101736	ENSG00000264063.1
-2.91311	3.19204	485.636	3.54474e-14	3.85078e-12	NDC80
-2.91673	4.80864	1730.33	6.73486e-19	9.58438e-15	HIST1H2BO
-2.91757	4.24979	954.293	1.12984e-16	9.19341e-14	CEP55
-2.92109	3.58045	838.384	3.42397e-16	1.62422e-13	CDCA2
-2.92389	5.04147	718.669	1.27603e-15	3.39555e-13	HIST1H2AJ
-2.92514	2.16655	492.149	3.168e-14	3.51529e-12	SGO1
-2.93071	3.29047	447.259	7.09055e-14	6.46417e-12	CKAP2L
-2.93786	2.97436	320.458	1.14895e-12	6.28876e-11	ESCO2
-2.94094	4.59614	510.625	2.32093e-14	2.75243e-12	CDC20
-2.94413	3.35136	470.104	4.662e-14	4.70532e-12	TTK
-2.95968	0.452873	180.628	1.23229e-10	3.45212e-09	APOBEC3B
-2.98651	0.0616972	106.518	7.5351e-09	1.24979e-07	ARHGEF39
-2.98878	3.48224	746.043	9.27705e-16	2.83433e-13	BUB1B
-3.00357	3.96772	550.686	1.22535e-14	1.70961e-12	HIST2H3D
-3.00743	5.47586	755.456	8.33584e-16	2.82446e-13	RRM2
-3.02038	3.03183	752.237	8.64516e-16	2.83433e-13	HIST1H2BB
-3.02983	2.94244	420.043	1.20146e-13	9.8832e-12	HIST1H2AL
-3.03282	4.48403	560.192	1.06003e-14	1.52377e-12	DLGAP5
-3.03524	5.87204	687.639	1.85855e-15	4.3359e-13	TOP2A
-3.05918	1.29389	337.7	7.43538e-13	4.37243e-11	CDC25C
-3.06346	3.74331	319.151	1.18856e-12	6.4806e-11	DEPDC1
-3.07308	2.04476	367.525	3.67396e-13	2.47198e-11	CENPA
-3.07434	1.64727	417.045	1.27589e-13	1.03755e-11	HIST1H3J
-3.08973	6.82947	681.037	2.01765e-15	4.63116e-13	MKI67
-3.11329	5.62182	693.556	1.72775e-15	4.16739e-13	ASPM
-3.11418	4.42365	514.533	2.17615e-14	2.61725e-12	KIF20A
-3.1502	2.88903	386.356	2.42015e-13	1.78452e-11	PBK
-3.1556	4.96687	784.931	6.01232e-16	2.26619e-13	HIST1H3C
-3.16025	3.13961	506.62	2.48051e-14	2.87943e-12	HMMR
-3.20206	-0.625726	59.5485	5.02294e-07	4.82331e-06	ZNF732
-3.21833	5.71739	1232.25	1.25744e-17	2.98245e-14	HIST1H1B
-3.23943	-0.681632	42.3823	4.70946e-06	3.40724e-05	NEURL1B
-3.25946	5.33835	939.474	1.29203e-16	9.19341e-14	HIST1H3B
-3.32327	4.70221	809.38	4.62639e-16	1.93642e-13	HIST1H3G
-3.41679	1.67866	524.818	1.84096e-14	2.26022e-12	E2F2
