# Supplementary material for: ELTD1 Activation Induces an Endothelial-EMT Transition to a Myofibroblast Phenotype
Source: Preprints.org preprint supplement (doi:10.20944/preprints202109.0402.v1), 2021-09-23
Supplement: Supplementary file 4 [file Table S4.xlsx]

## Sheet: Sheet1
Table S4. Differentially expressed genes at both 48 and 120hrs
ENSG00000231966.1
LINC00520
FST
PAPPA2
ANKRD33
ENSG00000230849.2
FOXF1
GREB1
NEK10
ENSG00000279266.1
CPNE7
BHLHE41
C2orf16
LIF
LINC00565
MX2
ADRB2
LINC02516
LCP1
DNAH8
LGALS3BP
ENSG00000235385.1
GDF5
LRRC66
LINC02407
FBXL13
ITGAX
DCBLD2
ENSG00000249631.4
ENSG00000226375.1
MMP10
PSTPIP2
NKX3-1
FER1L6
CXCL5
GDF15
ENSG00000273143.1
CCDC113
E2F7
IFIT3
ENSG00000271225.1
CDKN1A
TAF7L
TNFAIP8L3
CPED1
ENSG00000168260.2
PLPP4
PLA2G4A
CD79B
CCND2
NEURL3
ABTB2
MT1L
KBTBD11
MDM2
WDR63
MIR31HG
RELN
YAP1
ZNF730
HIST1H4F
USP1
ENSG00000267383.5
PSMC3IP
HMGN2
ARHGAP28
ZWINT
RAMP2
SMC2
ENSG00000279338.1
COL1A2
APOL4
SGO2
BLM
KIF4A
AMPH
PLK1
HIST1H2BL
SHCBP1
CCNB2
GJA4
BRCA2
CENPE
HIST1H4L
HIST1H2BJ
FANCB
E2F8
SAPCD2
KIF26A
KIF14
CENPK
MIR924HG
DHFR
EME1
ACE
MXD3
DDX12P
HIST1H2BE
HMMR
PCLAF
CENPM
KIF20A
CDC20
RECQL4
CDCA5
CLSPN
ENSG00000111788.10
AIF1L
MND1
ANLN
CDC25C
KIF23
ATAD2
ENSG00000226202.2
CCNA2
BUB1
ESPL1
ENSG00000269974.1
GINS2
ORC1
HIST1H3H
UHRF1
KIF18A
SNAP25
IQGAP3
CDC45
DLGAP5
NUSAP1
RTKN2
CDC6
LOC441179
BIRC5
XRCC2
ENSG00000241634.1
PSRC1
HIST1H2BI
CENPF
CDKN2C
NEIL3
ARHGEF39
POLQ
HIST1H2AB
CENPA
TCF19
OIP5
MYBL2
DEPDC1
HIST1H3D
HIST1H2AI
KNL1
KIF11
E2F1
NCAPG
GTSE1
HJURP
CDCA8
CDT1
HIST1H4I
PIMREG
KIF2C
CDCA3
SKA1
BUB1B
CKAP2L
ENSG00000276672.1
RAD51AP1
TMPO-AS1
EXO1
KIF15
HIST1H1D
CCNE2
UBE2C
CEP55
HIST1H2AG
BRIP1
PBK
HIST1H1A
NCAPH
DTL
RAD54L
HIST2H3D
DEPDC1B
PKMYT1
TTK
CDCA2
HIST1H2BB
HIST1H2AH
KIF18B
SPC25
ASPM
NDC80
CDK1
NUF2
FNDC5
FBXO43
AURKB
HIST1H3F
TOP2A
HIST1H2BO
RRM2
MCM10
ASF1B
ZNF695
HIST1H2BM
SGO1
ZNF367
HIST1H2AL
KIFC1
ERCC6L
NEURL1B
MKI67
ESCO2
HIST1H3C
RIBC2
MYCN
HIST1H3B
E2F2
HIST1H1B
HIST1H2AJ
FAM111B
PRND
HIST1H3J
HIST1H3G
LONRF2
NAT8L
RAB11FIP4
STC1
NEFM
ENSG00000240476.1
LAMB4
OLAH
CXCL8
SH2D5
IL7R
ANK2
GEM
ENSG00000240244.3
SLC6A9
IL31RA
TG
FHDC1
STC2
CLDN14
SPTB
LINC00862
AADACP1
ADM2
IL1A
HOMER2
ULBP1
KCNMB2-AS1
DIRAS1
PURPL
MYH14
TNFSF15
TNFRSF9
XIRP2
ENSG00000279142.1
NMRAL2P
ENSG00000257732.1
LPXN
NAV3
LAMA1
ATF3
DNAH11
LURAP1L-AS1
MYEOV
OSGIN1
ENSG00000211772.7
TTN
CA8
ENSG00000270607.1
AFF3
MMP1
CSMD3
BTBD11
RTL5
RRAD
CDKN2B
KCNMA1
TENT5A
ENSG00000225339.3
ALDH1L2
CCDC148
ENSG00000233680.4
ENKUR
TNFSF9
GABRR2
DOCK2
ENSG00000269998.1
ENSG00000260698.1
PTPRH
ENSG00000268225.1
STXBP5-AS1
FCGBP
CFAP70
ZNF596
ENSG00000271984.1
PAPPA
DMRTA1
ZDHHC11
RNF182
TFEC
KRT7
MAMDC2
CENPP
KIT
HIST1H4H
SCML2
PTTG1
MYH10
HIST1H4B
HIST2H2BE
SOX18
GIMAP1
IL33
AFAP1L2
DNA2
MBOAT1
CDC25A
C1orf112
LUM
GUCY1A1
MCM7
MCM5
VSTM2L
CSRP2
C5orf34
HERC2P3
GJC2
GMNN
PCDH18
TSPAN2
HIST1H4C
HIST1H3E
HIST1H2AD
GINS4
ENSG00000230330.1
POC1A
DCAF12L1
GPRIN3
RBL1
DLL4
GDF7
MMP28
MTFR2
DLEU2
SMC4
UBE2T
CIP2A
ITPRIPL1
CCNF
HCRTR1
INCENP
ENSG00000260244.1
HIST1H2BF
HIST1H1C
HAUS8
ENSG00000280079.1
TONSL
ENSG00000278925.1
APOBEC3B
SPIN4
DACH1
STIL
DIAPH3
EFNB3
PDE3A
H2AFX
GPSM2
CD302
CDC7
ZNF467
TMPO
RSPO3
MELK
FANCI
TRAIP
GPR146
NPR1
CDCA7
LRRC4
UNC5A
HIST2H2AB
CHTF18
S1PR4
ENSG00000248810.1
LMNB1
CKAP2
LOC100288637
KCNE3
HIST1H3I
MCM8
FBLN1
LMCD1
ATP8A1
CENPH
HSPA2
ZGRF1
VWA1
EGR3
PARPBP
FANCA
FAM72B
NCAPG2
TACC3
PIF1
PRR11
MCM2
PABPC4L
FOXM1
AURKA
CDKN3
FANCD2
KIF22
MTBP
ZNF724
FEN1
ENSG00000267194.1
TPX2
MCM4
HIST1H4A
HMGB2
MYBL1
C17orf53
AUNIP
CCDC150
CEP128
C21orf58
CENPI
ARHGAP11A
FBXO5
SULF1
AQP1
ZNF726
FAM83D
ITGA9
DSCC1
IGF2
HIST1H4D
KIF20B
RMI2
PLK4
TRIP13
RAD51
GINS1
SPC24
CCNB1
WDR62
ZNF732
KIF24
HIST2H2BF
CPXM1
HIST1H3A
TROAP
EMP2
HASPIN
PRIM1
SPAG5
POLE2
TK1
CXCL12
RACGAP1
CD34
CIT
MAD2L1
PRC1
MEOX2
SKA3
COL12A1
BRCA1
HIST1H2BH
ORC6
WDR76
FABP4
ENSG00000280120.1
TICRR
NEK2
HELLS
ATAD5
GJA5
CENPU
TRIL
RFC3
